# Supplementary material
Source: PubMed Central journal article supplement (PMC4598281)
Supplement: NIHMS715099-supplement-1.pdf [file NIHMS715099-supplement-1.pdf]

## **Supplementary Information:**

- Supplementary Discussion
- Supplementary Figure Legends
- Supplementary Table Legends
- Detailed Figure Statistics
- Supplementary References

## **Supplementary Discussion**

*Included here are several important points of discussion that could not be included in the main text due to space constraints. The reference numbers refer to Supplementary References at the end of Supplementary Information.*

ATP-dependent chromatin remodeling has long been shown to be important in orchestrating changes in nucleosome architecture and chromatin state to affect important cellular processes such as transcription, DNA replication, and DNA repair<sup>1,2</sup>, in addition to being implicated in many diseases<sup>3-6</sup>. Here we provide the first mechanistic study to causally implicate ATP-dependent chromatin remodeling factors in a psychiatric disorder. In particular, we show that upregulation of the ACF complex in NAc neurons is necessary for pro-susceptibility to stress and depressive-like behavior. The associated repression of a subset of genes is correlated with altered TSS nucleosome architecture at these genes, which suggests active nucleosome remodeling as a potential mechanism for the observed gene repression and behavioral effects. Due to the lack of technology to directly remodel nucleosomes at precise genomic loci in vivo, we cannot establish causality between active nucleosome remodeling at TSSs per se with the observed gene repression and stress susceptibility. However, our study is in agreement with

previous work demonstrating that yeast homologs of the ISWI and other families of chromatin remodeling complexes repress transcription by altering nucleosome positioning, in particular around TSSs<sup>7-9</sup>. Several studies in other systems have further confirmed ACF's transcriptional repressive role<sup>10-14</sup>.

Knowledge of upstream regulators of chromatin remodeling factors, particularly in the nervous system, remains limited. Here we identified *Baz1a* as an activity-regulated gene (**Fig. 2a, b**), which has broader implications for the neuroscience field. Furthermore, we demonstrate, both in cultured striatal neurons as well as in NAc *in vivo*, that BDNF increases *Baz1a* expression (**Fig. 2a,d**). These findings support the scheme that increased burst firing of VTA neurons and the release of BDNF in NAc, both previously causally implicated in mediating susceptibility to social defeat stress<sup>15,16</sup>, may be responsible for the persistent upregulation of BAZ1A in NAc of susceptible mice. Detailed dissection of the upstream signaling pathways underlying CSDS-mediated induction of BAZ1A is an important question for future studies.

While upregulated BAZ1A is necessary for susceptibility to social defeat stress (**Fig. 3c,e**), it is, by itself, not sufficient to induce depressive-like behaviors without the co-occurrence of stress (**Fig. 3d, Supplementary Fig. 4a,b**). We show that BAZ1A induction after CSDS is associated with increased levels of ACF complex formation with SMARCA5 (**Supplementary Fig. 1f**), either through recruitment of SMARCA5 from the reserve pool or through competition with other ISWI accessory subunits for SMARCA5 binding. We disprove the latter hypothesis at least for BAZ1B-SMARCA5 complexes, although this could not be ruled out completely for other ISWI accessory subunits due to the lack of suitable antibodies. However, in our behavioral studies, the overexpression of both BAZ1A and SMARCA5 was required to increase susceptibility to subthreshold social defeat stress (**Fig. 3a,b**). One possible explanation for this

observation is that CSDS induces multiple molecular changes in NAc, in addition to induction of BAZ1A per se, which enables it to induce susceptibility. These changes could include post-translational modifications that would favor the formation of ACF and their binding to their gene targets. It is possible that some of these molecular changes do not occur in the subthreshold defeat paradigm, such that the co-overexpression of both BAZ1A and SMARCA5 is needed to overcome the lack of these other molecular changes. Ultimately, future experiments are needed to address the biochemical properties of the ACF and its recruitment to target genes. Another key point to note here is that, although ACF induction is a key regulator for susceptibility to stress-induced depressive-like behavior, it is not the only regulator. Additionally, those genes that are repressed by the ACF likely represent only a subset of genes repressed in susceptible animals after CSDS. Furthermore, other regulators mediate induced gene expression in susceptible animals that are unexamined here. For example, our analysis of nucleosome remodeling factors alone revealed several other regulators that may contribute to stress susceptibility or resilience (**Supplementary Fig. 1a**). This study is thus only the beginning of examining ATP-dependent nucleosome remodelers in the pathophysiology of depression.

In contrast to NAc, we showed no effect of CSDS on *Baz1a* levels in medial prefrontal cortex (mPFC), and no effect of ACF complex overexpression in mPFC on stress susceptibility. It will be interesting in future studies to examine a possible role for ACF complexes in other depression-related brain regions. As well, all of our CSDS studies were performed by necessity on male mice (CSDS does not work for C57BL/6J females), while <25% of our human postmortem samples were female. This small sample size did not give us statistical power to separately analyze *BAZ1A* regulation specifically in depressed females. Therefore, to address this important question, we utilized a second mouse model of depression—chronic unpredictable

stress—and found similar induction of *Baz1a* in NAc of stressed female and male mice (**Fig. 1d**), which suggests the involvement of BAZ1A in female depression as well. Finally, the majority of our human depression patients died from suicide, which may represent a specific subpopulation of depressed patients. These factors should be examined in future studies as more postmortem human depression samples become available.

Although ChIP–seq with nucleosome remodeling factors, especially for microdissected brain samples, are notoriously difficult and typically generate noisy data, we have succeeded here in generating quality data that successfully identified *bona fide* targets of the ACF. As reported in Results, we conducted several important quality control analyses to ensure good signal to noise ratio and good reproducibility between replicates of the same condition. Instead of using traditional peak calling methods typically used for histone marks, we used ChromHMM both to deal with the sometimes broad and diffuse signals of chromatin remodeling factors and to identify genomic loci with coinciding enrichment of both BAZ1A and SMARCA5 (ACF complex). Bioinformatics analysis as well as visual inspection of the ChIP–seq tracks (**Fig. 4a,b**, **Supplementary Fig. 5c–f**) revealed ACF enrichment in NAc of susceptible animals at many genic and intergenic loci. Additionally, we provided transcriptional validation of identified ACF targets: ~60% showed repressed expression in NAc of susceptible animals and ~40% of those showed reversal of repression upon BAZ1A knockdown (**Fig. 5a,b**). Furthermore, we provided functional validation—which is rarely incorporated into next generation sequencing studies: several of the validated targets control CSDS behavior (**Fig. 5c,d**). By contrast, the observation that none of randomly generated genes, which did not show ACF enrichment by ChIP–seq, showed transcriptional and functional validation is further proof of the specificity and utility of our ChIP–seq dataset (**Supplementary Fig. 7e–g**).

The nucleosome maps generated here will serve as an important resource for future studies. As discussed above, the increased ACF in susceptible animals is associated with nucleosome positioning/shift events at the NDR and the  $-1$  nucleosome. However, additional nucleosome occupancy and shift changes were observed after CSDS (**Fig. 4c**, **Supplementary Fig. 6b,c**), for example, the general decrease in nucleosome occupancy at the  $+1$  nucleosome, an effect observed for genes in susceptible and resilient animals independent of changes in ACF binding (**Supplementary Fig. 6d**). Such effects could be mediated by other chromatin remodeling factors that are regulated by CSDS (**Supplementary Fig. 1a**), an interesting subject for future investigations.

## Supplementary Figure Legends

**Supplementary Figure 1** Regulation of ATP–dependent chromatin remodelers after social defeat. **(a)** NAc mRNA levels of genes from families of ATP–dependent chromatin remodelers and their accessory units 10 days after CSDS. Numbers in boxes indicate fold change compared to control animals. Red and green represent increases and decreases, respectively, in mRNA levels compared to control; intensity of color is representative of fold change. **(b)** NAc mRNA levels of *Baz1a*, *Baz1b*, and *Smarca5* 10 days after CSDS. **(c)** NAc protein levels of BAZ1A, BAZ1B, and SMARCA5 10 days after CSDS. **(d)** NAc mRNA levels of *Baz1a*, *Baz1b*, and *Smarca5* 28 days after CSDS. **(e)** NAc protein levels of BAZ1A, BAZ1B, and SMARCA5 28 days after CSDS. **(f)** Immunoprecipitation of SMARCA5–containing complexes in NAc 48 hours after CSDS. **(g)** ISWI mRNA in NAc 48 hours after a single 5–min defeat session. **(h)** mPFC mRNA levels of *Baz1a*, *Baz1b*, and *Smarca5* 48 hours after CSDS. **(i)** mPFC mRNA levels of *Baz1a*, *Baz1b*, and *Smarca5* 10 days after CSDS. Post–hoc Student’s t–test \*  $P < 0.05$  compared to respective controls.

**Supplementary Figure 2** Regulation of *Baz1a* mRNA levels and social interaction by optogenetic stimulation. **(a)** *Baz1a* mRNA levels in NAc after chronic optogenetic stimulation of medial prefrontal cortex. **(b)** *Baz1a* mRNA levels in NAc after chronic optogenetic stimulation of hippocampus. **(c)** Social interaction after chronic VTA to NAc optogenetic stimulation in control animals. Paradigm for the experiment was as shown on the left panel.

**Supplementary Figure 3** Regulation of social interaction behavior by ACF. **(a)** **(b)** Validation of HSV–BAZ1A and HSV–SMARCA5, respectively, for their protein overexpression in NAc *in*

*vivo*. (c) ACF overexpression in mPFC does not affect social interaction (SI, left panel) or sucrose preference (SP, right panel) after subthreshold defeat. Experimental paradigm is shown in the panel above. (d) Validation of AAV-BAZ1A miR in NAc *in vivo*. (e) (f) Correlation between *Baz1a* mRNA levels in NAc and (e) social interaction ratio and (f) sucrose preference ratio. The same animals were used as in Fig. 3c. Post-hoc Student's *t*-test \*  $P < 0.05$  vs respective controls.

**Supplementary Figure 4** Lack of regulation of behavior by ACF manipulation in control animals. Experimental paradigms were shown above each panel. (a) Overexpression of ACF in NAc of control, non-stressed animals does not alter social interaction (SI, left panel), anxiety-related behavior in elevated plus maze (EPM, middle panel), and sucrose preference (SP, right panel) behaviors. (b) Knockdown of BAZ1A in NAc of control, non-stressed animals does not alter social interaction (SI, left panel), anxiety-related behavior in elevated plus maze (EPM, middle panel), or sucrose preference (SP, right panel) behaviors. (c) ACF overexpression in NAc does not affect locomotor behaviors in control animals. (d) ACF overexpression in NAc does not affect freezing behavior in contextual fear conditioning.

**Supplementary Figure 5** BAZ1A and SMARCA5 ChIP-seq visualization. (a) IGV browser track view of BAZ1A and SMARCA5 ChIP-seq peaks in NAc with enrichment over input. (b) Corrgram package analysis was conducted in R for the correlation. The upper right panel is the reflection of correlation *r* value. The size of the pie reflects the value of *r*, blue reflects positive correlation. The lower left panel is a variation of a correlation scatterplot. The correlation ellipses are the reflection of the scatterplot of two variables, showing the confidence intervals, and the

red lines are the LOWESS smoothed curve.  $P < 2.2 \times 10^{-16}$  for correlation. For (c)–(f), IGV visualization of BAZ1A and SMARCA5 ChIP–seq tracks at specific genomic loci (c–*Rab3* locus, d–*Agtr1b* locus, e/f–intergenic loci) in either separate tracks (left panel) or overlaid tracks (right panel) in NAc of control/susceptible/resilient animals. IGV 2.3 (Broad Institute) was used for visualization of all ChIP–seq track.

**Supplementary Figure 6** BAZ1A and SMARCA5 ChIP–seq analysis. (a) Breakdown of ACF complex enriched loci in NAc identified by ChromHMM for control/susceptible/resilient animals into intergenic and genic regions. (b) Breakdown of nucleosome occupancy changes for both susceptible vs control (upper panel) and resilient vs control (lower panel) comparisons. In addition to separating changes into intergenic and genic regions, the exact numbers of increased/decreased nucleosome occupancy events are also shown beside each section. The sizes of the sections are roughly proportional to the absolute amount of occupancy change events. (c) Breakdown of nucleosome shift/positioning changes for both susceptible vs control (upper panel) and resilient vs control (lower panel) comparisons. In addition to separating changes into intergenic and genic regions, the exact numbers of upstream/downstream shifts in nucleosome positioning are also shown beside each section. The sizes of the sections are roughly proportional to the absolute amount of shift change events. (d) Promoter nucleosome profile in NAc around TSS and NDR “height”. Average nucleosome profile around TSSs for genes enriched for ACF binding sites in NAc of susceptible animals (upper left panel; for gene list, see Supplementary Table 4) as well as a randomly generated group of ~500 genes that do not exhibit ACF enrichment in susceptible animals (upper right panel; for gene list, see Supplementary Table 6). The promoter nucleosome profile for control/susceptible/resilient animals are overlaid for each



respective set of genes. NDR “height” for each set of genes was calculated by subtracting the normalized read count from top of the +1 nucleosome by the normalized read count from the bottom of the TSS and plotted on the bottom two panels. Where we defined the top of the +1 nucleosome and the bottom of the TSS was indicated on the overlaid nucleosome profile by blue and red arrows respectively. (e) Average (from 3 replicates) binding profile of BAZ1A in NAc 1000 bp up- and downstream of TSSs for genes as a function of their expression levels under control conditions, categorizing genes as low, medium, or high expression

**Supplementary Figure 7** Regulation of depressive-like behavior by downstream target and non-target of ACF. (a)–(c) Validation of HSV–Rab3b and HSV–Agr1b in NAc *in vivo*. (d) Correlation between RAB3B protein levels and how well the animal recovered from CSDS (post-surgery SI ratio – pre-surgery SI ratio). These were the same animals as in Fig 5c. (e) Lack of gene regulation in NAc by CSDS for 10/10 of these randomly generated non-targets of ACF complex. (f) Lack of regulation of these non-targets by BAZ1A knockdown in NAc. (g) PRMT5 overexpression did not rescue susceptibility after CSDS. Post-hoc Student’s t-test \*  $P < 0.05$ , \*\*\*  $P < 0.001$  vs respective controls.

## **Supplementary Tables Legends**

### **Supplementary Table 1** Demographic information for human depression patient cohort 1 and 2.

For cohort 1, NAc tissue, obtained from the Dallas Brain Collection at UT Southwestern, was analyzed for depressed subjects and matched controls. Ht–height; Wt–weight; BMI: body mass index. For sex, M–male; F–female. For race: B–African–American; C–Caucasian. Y–Yes; N–No. For cohort 2, NAc tissue, obtained from the Quebec Suicide Brain Bank (QSBB; Douglas Mental Health Institute, Verdun, Québec), was analyzed for depressed subjects and matched controls. M–male; F–female, AD–antidepressant.

**Supplementary Table 2** Quality control for ChIP–seq libraries. ChIP–seq data were aligned to the mouse genome (mm9) by CASAVA 1.8, and only unique reads were retained for analysis by ELAND. FastQC was applied for quality control, and then SAMTools was used to remove potential PCR duplicates<sup>17</sup>. PhantomPeak was applied to estimate the quality and enrichment (NSC and RSC) of the ChIP–seq dataset.

**Supplementary Table 3** Correlation analysis between individual BAZ1A and SMARCA5 ChIP–seq replicates from NAc. The genome is split into non–overlapping bins 1 kb long and the number of short reads overlapping each bin is counted. Each read is assigned to the bin that is closest to its mapping location and is not double counted. To avoid unmappable regions and background regions that represent noise, an arbitrary cutoff of 2 across all replicates is used as a filter for each bin. The read counts are normalized to a standard value representing a library size of one million. Pearson correlations between all replicates are then calculated.

**Supplementary Table 4** ACF binding sites in the NAc of control, susceptible, and resilient animals after CSDS. Coincident BAZ1A and SMARCA5 binding sites were extracted from ChromHMM analysis of ChIP-seq data as described in Methods. Control-enriched sites were defined as sites that were only found in control conditions but not within 2 kb in either susceptible or resilient conditions. The chromosomal locations of these sites are shown in the Table as Start to Finish, and annotated to the genome accordingly.

**Supplementary Table 5** Nucleosome occupancy and shift events after CSDS. Nucleosome occupancy and shift events after CSDS were computed from H3 ChIP-seq data using DANPOS as described in Methods. The chromosomal locations of these events were shown in the Table as Start to Finish, and were then annotated to the genome accordingly.

**Supplementary Table 6** List of randomly generated genes that do not have ACF enrichment in susceptible animals.

**Supplementary Table 7** Complete qPCR primer list.

## Detailed Figure Statistics

### Fig 1.

(b) *Baz1a*: one-way ANOVA:  $F(2,26) = 3.030$ ,  $P = 0.066$ ; susceptible vs control:  $t(20) = 2.389$ ,  $P < 0.05$ . *Baz1b*: one-way ANOVA:  $F(2,26) = 1.947$ ,  $P = 0.163$ . *Smarca5*: one-way ANOVA:  $F(2,26) = 0.081$ ,  $P = 0.923$ . Control:  $n = 10$ ; Susceptible:  $n = 11$ ; Resilient:  $n = 7$ .

(c) BAZ1A: one-way ANOVA:  $F(2,17) = 3.176$ ,  $P = 0.067$ ; susceptible vs control:  $t(11) = 2.384$ ,  $P < 0.05$ . BAZ1B: one-way ANOVA:  $F(2,18) = 1.444$ ,  $P = 0.262$ . SMARCA5: one-way ANOVA:  $F(2,18) = 0.455$ ,  $P = 0.642$ . Control:  $n = 6-7$ ; Susceptible:  $n = 7-8$ ; Resilient:  $n = 6-7$ .

(d) Two-way ANOVA, Interaction:  $F(1,25) = 0.1754$ ,  $P = 0.679$ ; Stress:  $F(1,25) = 12.84$ ,  $P = 0.0014$ ; Sex:  $F(1,25) = 5.180$ ,  $P = 0.0317$ . Control male vs Stressed male:  $t(12) = 2.46$ ,  $P < 0.05$ . Control female vs Stressed female:  $t(13) = 2.64$ ,  $P < 0.05$ . Control male vs Control female:  $t(13) = 1.29$ ,  $P = 0.22$ . Stressed male vs Stressed female:  $t(12) = 1.954$ ,  $P = 0.074$ . Control male:  $n = 7$ ; Stressed male:  $n = 7$ ; Control female:  $n = 8$ ; Stress female:  $n = 7$ .

(e) Cohort 1 BAZIA:  $t(19) = 2.239$ ,  $P < 0.05$ . Control:  $n = 10-11$ ; Depressed:  $n = 9-10$ . Cohort 2 BAZIA:  $t(27) = 2.490$ ,  $P < 0.05$ . Control:  $n = 9$ ; Depressed:  $n = 20$ .

### Fig 2.

(a) BDNF:  $t(4) = 3.651$ ,  $P < 0.05$ ; KCl:  $t(4) = 5.413$ ,  $P < 0.01$ . Control:  $n = 3$ ; KCl:  $n = 3$ ; BDNF:  $n = 3$ .

(b) *Baz1a*:  $t(24) = 2.26$ ,  $P < 0.05$ . Control:  $n = 18$ ; Chr2:  $n = 8$ .

(c) Control vs Chr2:  $t(14) = 3.913$ ;  $P < 0.01$ .  $n = 8$  for all groups

(d) *Baz1a*:  $t(15) = 2.156$ ,  $P < 0.05$ . Control:  $n = 8$ ; BDNF:  $n = 9$ .

**Fig 3.**

(a) Left panel –one–way ANOVA:  $F(3,76) = 2.888$ ;  $P = 0.041$ ; GFP vs BAZ1A + SMARCA5:  $t(39) = 2.797$ ,  $P = 0.008$ ; BAZ1A vs BAZ1A+SMARCA5:  $t(32) = 2.714$ ,  $P = 0.011$ ; SMARCA5 vs BAZ1A + SMARCA5:  $t(31) = 2.035$ ,  $P = 0.050$ . GFP:  $n = 27$ ; BAZ1A:  $n = 20$ ; SMARCA5:  $n = 19$ ; BAZ1A + SMARCA5:  $n = 15$ .

Right panel – one–way ANOVA:  $F(3,30) = 4.269$ ;  $P = 0.0127$ ; GFP vs BAZ1A + SMARCA5:  $t(14) = 2.420$ ,  $P = 0.030$ ; BAZ1A vs BAZ1A + SMARCA5:  $t(14) = 1.972$ ,  $P = 0.069$ ; SMARCA5 vs BAZ1A + SMARCA5:  $t(14) = 2.849$ ,  $P = 0.013$ . GFP:  $n = 9$ ; BAZ1A:  $n = 9$ ; SMARCA5:  $n = 9$ ; BAZ1A + SMARCA5:  $n = 7$ .

(b) Left panel –  $t(32) = 2.177$ ,  $P = 0.037$ ; GFP:  $n = 23$ ; BAZ1A + SMARCA5:  $n = 11$ . Middle panel –  $t(15) = 2.660$ ,  $P = 0.018$ ; GFP:  $n = 8$ ; BAZ1A + SMARCA5:  $n = 9$ . Right panel –  $t(15) = 1.884$ ,  $P = 0.079$ ; GFP:  $n = 7$ ; BAZ1A + SMARCA5:  $n = 10$ .

(c) Left panel –  $t(19) = 2.320$ ,  $P = 0.032$ ; GFP:  $n = 11$ ; BAZ1A miR:  $n = 10$ . Middle panel –  $t(19) = 1.851$ ,  $P = 0.080$ ; GFP:  $n = 11$ ; BAZ1A miR:  $n = 10$ . Right panel –  $t(17) = 2.127$ ,  $P = 0.048$  GFP:  $n = 10$ ; BAZ1A miR:  $n = 9$ .

(d) GFP:  $n = 7$ ; BAZ1A + SMARCA5:  $n = 7$ .

(e) two–way ANOVA, pre/post surgery:  $F_{1,28} = 9.292$ ,  $P < 0.01$ ; virus:  $F_{1,60} = 4.795$ ,  $P < 0.05$ ; interaction:  $F_{1,28} = 5.120$ ,  $P < 0.05$ ; AAV GFP pre vs post surgery:  $t(14) = 0.5093$ ,  $P = 0.618$ ; AAV–BAZ1A miR pre– vs. post–surgery:  $t(14) = 4.171$ ,  $P < 0.001$ ; post–surgery AAV–GFP vs AAV–BAZ1A miR:  $t(14) = 2.816$ ,  $P = 0.014$ . GFP:  $n = 8$ ; BAZ1A miR:  $n = 8$ .

**Fig. 4**

(a)  $\chi^2(df = 2) = 225.638, P < 0.0001$ . Control vs susceptible:  $\chi^2(df = 1) = 128.48, P < 2.2 \times 10^{-16}$ ; susceptible vs resilient:  $\chi^2(df = 1) = 165.893, P < 2.2 \times 10^{-16}$ ; control vs resilient:  $\chi^2(df = 1) = 2.724, P = 0.099$ . (c) Occupancy:  $\chi^2(df = 1) = 15171.88, P < 2.2 \times 10^{-16}$ . Shift:  $\chi^2(df = 1) = 2434.98, P < 2.2 \times 10^{-16}$ .

### Fig. 5

(a) *Sdk2*: one-way ANOVA  $F(2,20) = 3.141, P = 0.065$ , susceptible vs control:  $t(13) = 2.112, P = 0.055$ , resilient vs control,  $t(14) = 0.0660, P = 0.066$ . *Rab3b*: one-way ANOVA  $F(2,11) = 2.083, P = 0.061$ , susceptible vs control:  $t(10) = 2.856, P < 0.05$ . *Runx1*: one-way ANOVA  $F(2,21) = 5.010, P = 0.017$ , susceptible vs control:  $t(14) = 2.644, P < 0.05$ . *Prdm16*: one-way ANOVA  $F(2,17) = 2.666, P = 0.098$ , susceptible vs control:  $t(10) = 2.856, P < 0.05$ . *Nit1*: one-way ANOVA  $F(2,20) = 2.447, P = 0.112$ , susceptible vs control:  $t(13) = 1.770, P = 0.10$ , resilient vs control:  $t(14) = 2.273, P < 0.05$ . *Kcnj6*: one-way ANOVA  $F(2,20) = 3.783, P = 0.040$ , susceptible vs control:  $t(13) = 2.925, P < 0.05$ . *Grid2*: one-way ANOVA  $F(2,20) = 4.203, P = 0.030$ , susceptible vs control:  $t(13) = 2.719, P < 0.05$ . *Cadps2*: one-way ANOVA  $F(2,20) = 3.068, P = 0.069$ , susceptible vs control:  $t(13) = 2.816, P < 0.05$ . *Zbtb7c*: one-way ANOVA  $F(2,21) = 2.293, P = 0.126$ , susceptible vs control:  $t(14) = 2.159, P < 0.05$ . *Agtr1b*: one-way ANOVA  $F(2,19) = 3.991, P = 0.036$ , susceptible vs control:  $t(12) = 3.343, P < 0.01$ . *Dmrt1*: one-way ANOVA  $F(2,19) = 4.284, P = 0.029$ , susceptible vs control:  $t(12) = 4.084, P < 0.01$ ; resilient vs control:  $t(12) = 2.341, P < 0.05$ . *Plcz1*: one-way ANOVA  $F(2,20) = 3.458, P = 0.051$ , susceptible vs control:  $t(13) = 2.381, P < 0.05$ . *Espnl*: one-way ANOVA  $F(2,21) = 4.007, P = 0.034$ , susceptible vs control:  $t(14) = 2.803, P < 0.05$ . *Mad11l*: one-way ANOVA  $F(2,19) = 3.059, P = 0.071$ , susceptible vs control:  $t(12) = 2.602, P < 0.05$ . *Zfp438*: one-way ANOVA

$F(2,22) = 3.433, P = 0.052$ , susceptible vs control:  $t(13) = 1.978, P = 0.07$ , resilient vs control:  $t(13) = 2.172, P < 0.05$ .  $n = 5-8$  for control, susceptible and resilient.

**(b)** *Rab3b*:  $t(19) = 3.319, P < 0.01$ . *Prdm16*:  $t(18) = 2.014, P = 0.059$ . *Zbtb7c*:  $t(20) = 2.166, P < 0.05$ . *Agtr1b*:  $t(19) = 2.091, P = 0.05$ . *Plcz1*:  $t(14) = 2.934, P < 0.05$ . *Espnl*:  $t(14) = 2.209, P < 0.05$ . GFP:  $n = 11-12$ ; BAZ1A miR:  $n = 9-10$ .

**(c)** two-way ANOVA, pre/post surgery:  $F_{1,36} = 5.02, P < 0.05$ ; virus:  $F_{2,36} = 3.50, P < 0.05$ ; interaction:  $F_{2,36} = 3.04, P = 0.05$ ; HSV-RAB3B pre vs post surgery:  $t(12) = 1.80, P = 0.097$ ; HSV-AGTR1B pre- vs. post-surgery:  $t(10) = 1.95, P = 0.080$ ; post-surgery HSV-GFP vs HSV-RAB3B:  $t(13) = 2.43, P < 0.05$ ; post-surgery HSV-GFP vs HSV-AGTR1B:  $t(12) = 3.39, P < 0.01$ . GFP:  $n = 8$ ; RAB3B:  $n = 7$ , AGTR1B:  $n = 6$ . **(d)** one-way ANOVA:  $F(2,12) = 3.81, P = 0.051$ ; HSV-RAB3B vs HSV-GFP:  $t(8) = 1.938, P = 0.089$ ; HSV-AGTR1B vs HSV-GFP:  $t(8) = 2.233, P = 0.056$ ;  $n = 5$  for all groups. **(e)** *RAB3B*:  $t(27) = 1.899, P < 0.05$ . *AGTR1*:  $t(27) = 0.887, NS$ . Control:  $n = 9$ ; Depressed:  $n = 20$ .

### Supplementary Fig. 1

**(a)**  $n = 8-10$  for control, susceptible, or resilient.

**(b)** *Baz1a*: one-way ANOVA:  $F(2,43) = 3.674, P = 0.034$ ; susceptible vs control:  $t(33) = 2.502, p < 0.05$ . *Baz1b*: one-way ANOVA:  $F(2,43) = 2.238, P = 0.119$ . *Smarca5*: one-way ANOVA:  $F(2,43) = 0.024, P = 0.976$ . Control:  $n = 18$ ; susceptible:  $n = 17$ ; resilient:  $n = 11$ .

**(c)** BAZ1A: one-way ANOVA:  $F(2,31) = 6.048, P = 0.006$ ; susceptible vs control:  $t(19) = 3.748, P < 0.05$ ; resilient vs control:  $t(22) = 2.305, P < 0.05$ . BAZ1B: one-way ANOVA:  $F(2,31) = 0.107, P = 0.899$ . SMARCA5: one-way ANOVA:  $F(2,33) = 0.408, P = 0.668$ . Control:  $n = 10-11$ ; susceptible:  $n = 11-12$ ; resilient:  $n = 13$ .

(d) *Baz1a*: one-way ANOVA:  $F(2,22) = 3.193$ ,  $P = 0.061$ ; susceptible vs control:  $t(16) = 2.366$ ,  $P < 0.05$ . *Baz1b*: one-way ANOVA:  $F(2,22) = 0.198$ ,  $P = 0.822$ . *Smarca5*: one-way ANOVA:  $F(2,22) = 1.354$ ,  $P = 0.279$ . Control:  $n = 10$ ; susceptible:  $n = 8$ ; resilient:  $n = 7$ .

(e) BAZ1A: one-way ANOVA:  $F(2,17) = 3.040$ ,  $P = 0.074$ ; susceptible vs control:  $t(13) = 2.636$ ,  $P < 0.05$ . BAZ1B: one-way ANOVA:  $F(2,12) = 0.0106$ ,  $P = 0.900$ . SMARCA5: one-way ANOVA:  $F(2,10) = 0.045$ ,  $P = 0.956$ .  $n = 4-8$  for control, susceptible, or resilient animals.

(f) BAZ1A: one-way ANOVA:  $F(2,18) = 2.674$ ,  $P = 0.096$ ; susceptible vs control:  $t(12) = 2.240$ ,  $P < 0.05$ . BAZ1B: one-way ANOVA:  $F(2,18) = 1.123$ ,  $P = 0.347$ . Control:  $n = 8$ ; susceptible:  $n = 6$ ; resilient:  $n = 7$ .

(g) Control:  $n = 15$ ; single defeat:  $n = 13$ .

(h) *Baz1a* in the mPFC: one-way ANOVA  $F(2,16) = 3.183$ ,  $P = 0.069$ ; control vs resilient:  $t(11) = 2.223$ ;  $P = 0.048$ .  $n = 7-8$  for all groups.

(i)  $n = 7-8$  for all groups.

### Supplementary Fig. 2

(a) mPFC control:  $n = 14$ ; mPFC ChR2:  $n = 10$ .

(b) HP control:  $n = 5$ ; HP ChR2:  $n = 6$ .

(c)  $n = 9$  for control;  $n = 10$  for ChR2.

### Supplementary Fig. 3

(a) HSV-BAZ1A:  $t(14) = 2.71$ ,  $P < 0.05$ .  $n = 7-9$  for all groups.

(b) HSV-SMARCA5:  $t(13) = 2.41$ ,  $P < 0.05$ .  $n = 7-9$  for all groups.

(c)  $n = 7$  for all groups

(d)  $t(10) = 2.451$ ,  $P = 0.034$ .  $n = 5-7$  for all groups.



(e)  $r = -0.23$ ,  $P = 0.1632$ ,  $n = 20$ .

(f)  $r = -0.39$ ,  $P = 0.048$ ,  $n = 19$ .

#### **Supplementary Fig. 4**

(a)  $n = 6-7$  for all overexpression groups.

(b)  $n = 9-10$  for all knockdown groups.

(c)  $n = 7$  for all groups.

(d)  $n = 10$  for all groups.

#### **Supplementary Fig. 7**

(a) HSV-RAB3B:  $t(8) = 2.57$ ,  $P < 0.05$ .  $n = 5$  for all groups

(b) HSV-AGTR1B:  $t(8) = 5.10$ ,  $P < 0.001$ .  $n = 5$  for all groups.

(c) HSV-RAB3B:  $t(13) = 2.565$ ,  $P < 0.05$ .  $n = 8$  for HSV-GFP,  $n = 7$  for HSV-RAB3B.

(d)  $r = 0.6461$ ,  $P < 0.01$ ,  $n = 15$

(e)  $n = 5-8$  for control, susceptible and resilient.

(f) GFP:  $n = 12$ ; BAZ1A miR:  $n = 9$ .

(g)  $n = 5$  for all groups.

## Supplementary References

1. Narlikar, G.J., Sundaramoorthy, R. & Owen-Hughes, T. Mechanisms and functions of ATP-dependent chromatin-remodeling enzymes. *Cell* **154**, 490-503 (2013).
2. Clapier, C.R. & Cairns, B.R. The biology of chromatin remodeling complexes. *Annu Rev Biochem* **78**, 273-304 (2009).
3. Vallaster, M., Vallaster, C.D. & Wu, S.M. Epigenetic mechanisms in cardiac development and disease. *Acta Biochim Biophys Sin (Shanghai)* **44**, 92-102 (2012).
4. Wu, J.I. Diverse functions of ATP-dependent chromatin remodeling complexes in development and cancer. *Acta Biochim Biophys Sin (Shanghai)* **44**, 54-69 (2012).
5. Buscarlet, M., *et al.* Essential role of BRG, the ATPase subunit of BAF chromatin remodeling complexes, in leukemia maintenance. *Blood* **123**, 1720-1728 (2014).
6. Vogel-Ciernia, A., *et al.* The neuron-specific chromatin regulatory subunit BAF53b is necessary for synaptic plasticity and memory. *Nat Neurosci* **16**, 552-561 (2013).
7. Whitehouse, I., Rando, O.J., Delrow, J. & Tsukiyama, T. Chromatin remodelling at promoters suppresses antisense transcription. *Nature* **450**, 1031-1035 (2007).
8. Yadon, A.N., *et al.* Chromatin remodeling around nucleosome-free regions leads to repression of noncoding RNA transcription. *Mol Cell Biol* **30**, 5110-5122 (2010).
9. Yen, K., Vinayachandran, V., Batta, K., Koerber, R.T. & Pugh, B.F. Genome-wide nucleosome specificity and directionality of chromatin remodelers. *Cell* **149**, 1461-1473 (2012).
10. Deuring, R., *et al.* The ISWI chromatin-remodeling protein is required for gene expression and the maintenance of higher order chromatin structure in vivo. *Mol Cell* **5**, 355-365 (2000).
11. Fyodorov, D.V., Blower, M.D., Karpen, G.H. & Kadonaga, J.T. Acf1 confers unique activities to ACF/CHRAC and promotes the formation rather than disruption of chromatin in vivo. *Genes Dev* **18**, 170-183 (2004).
12. Shogren-Knaak, M., *et al.* Histone H4-K16 acetylation controls chromatin structure and protein interactions. *Science* **311**, 844-847 (2006).
13. Liu, Y.I., *et al.* The chromatin remodelers ISWI and ACF1 directly repress Wingless transcriptional targets. *Dev Biol* **323**, 41-52 (2008).
14. Ewing, A.K., Attner, M. & Chakravarti, D. Novel regulatory role for human Acf1 in transcriptional repression of vitamin D3 receptor-regulated genes. *Mol Endocrinol* **21**, 1791-1806 (2007).
15. Chaudhury, D., *et al.* Rapid regulation of depression-related behaviours by control of midbrain dopamine neurons. *Nature* **493**, 532-536 (2013).
16. Walsh, J.J., *et al.* Stress and CRF gate neural activation of BDNF in the mesolimbic reward pathway. *Nat Neurosci* (2013).
17. Li, H., *et al.* The Sequence Alignment/Map format and SAMtools. *Bioinformatics* **25**, 2078-2079 (2009).

**a**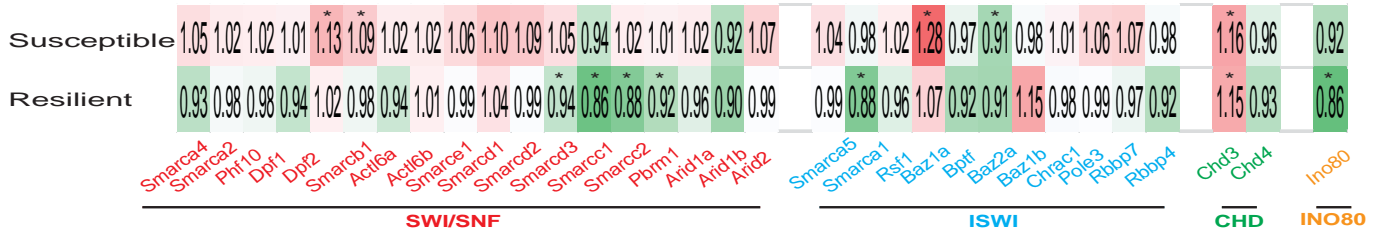**b**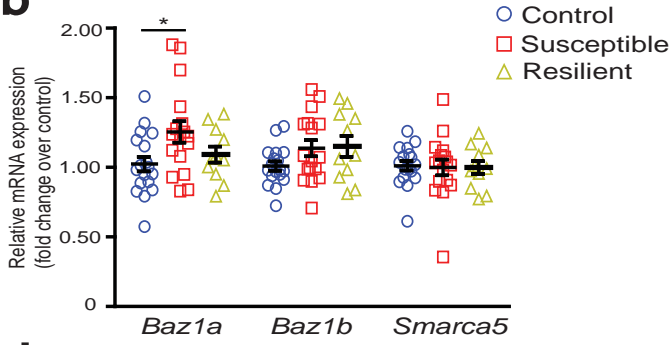**c**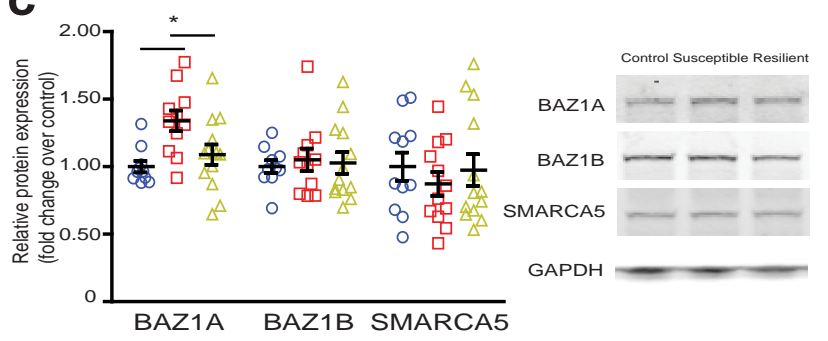**d**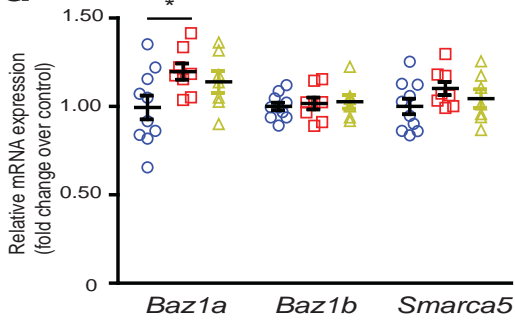**e**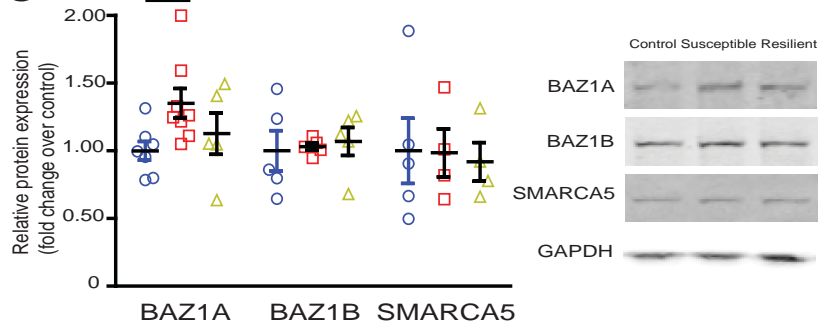**f**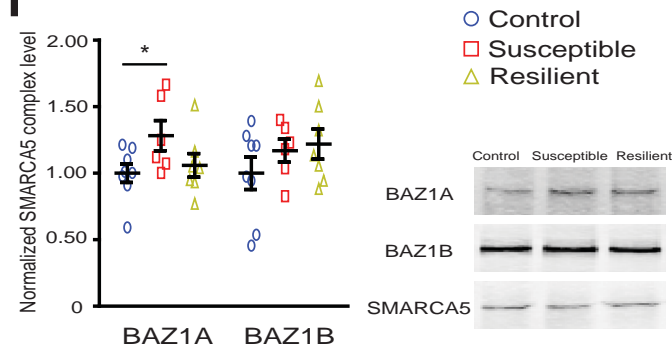**g**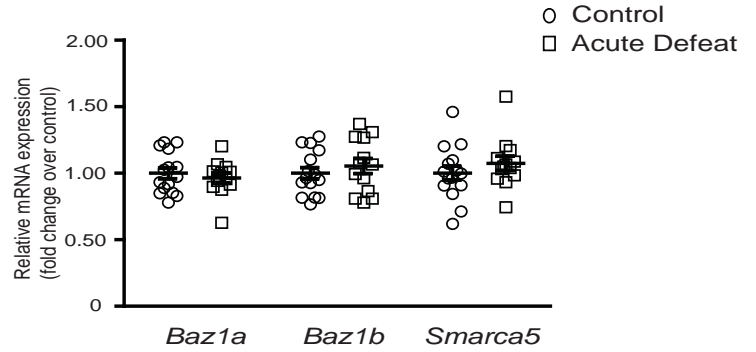**h**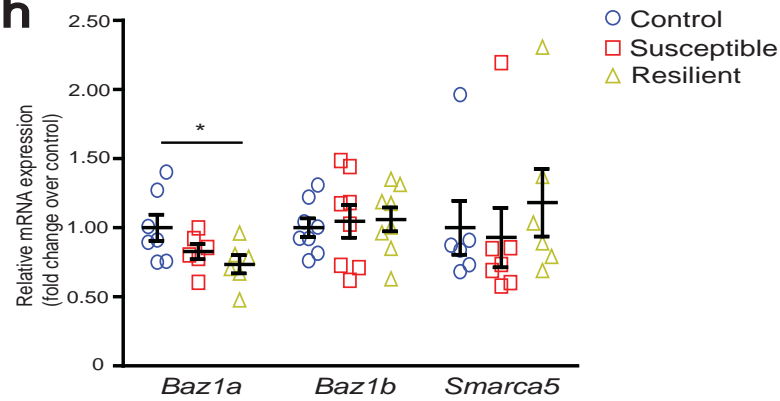**i**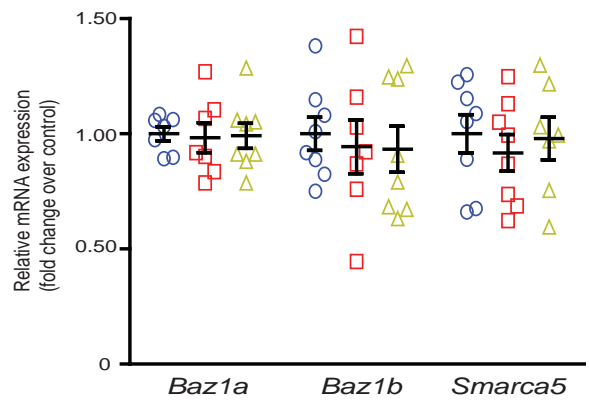

**a**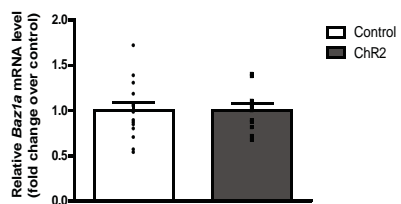**b**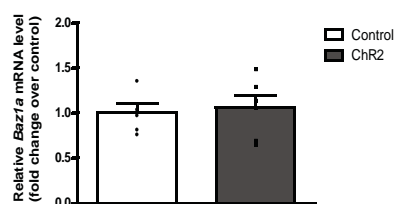**c**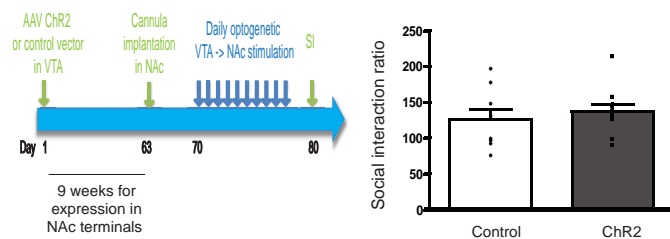**Supplementary Figure 2**

**a**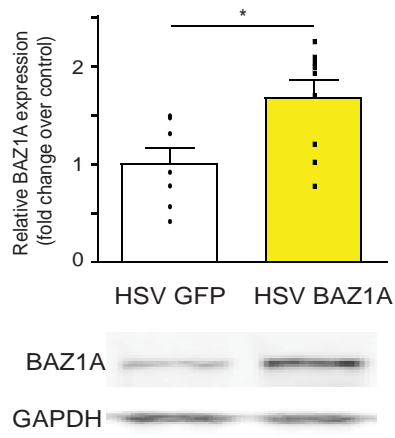**b**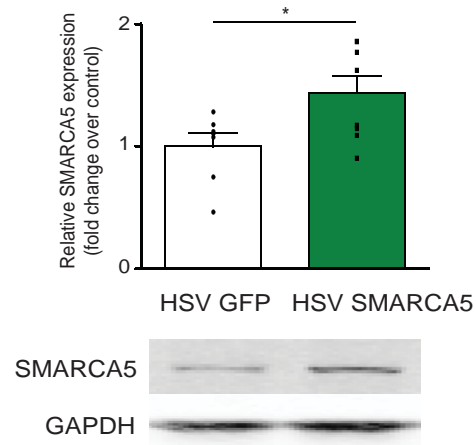**c**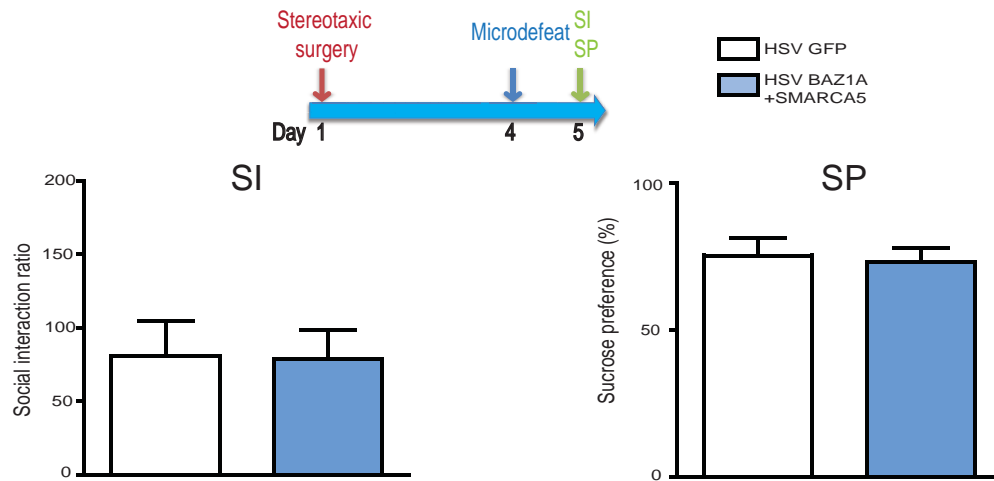**d**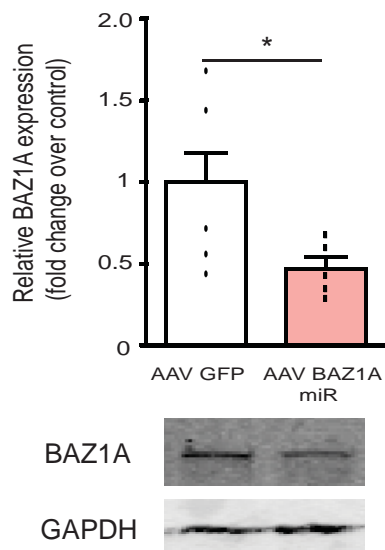**e**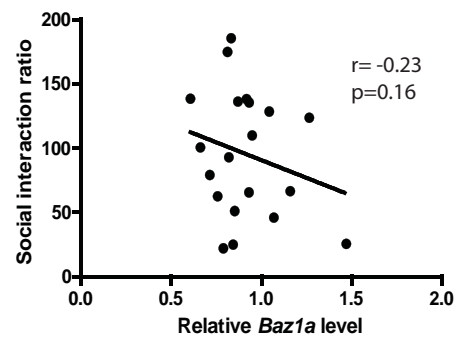**f**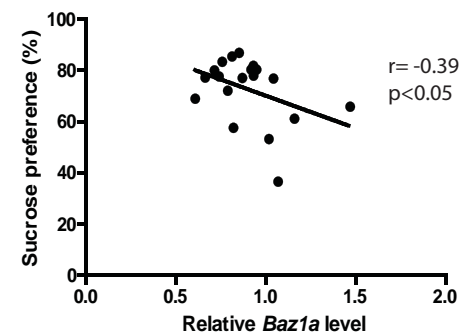

**a**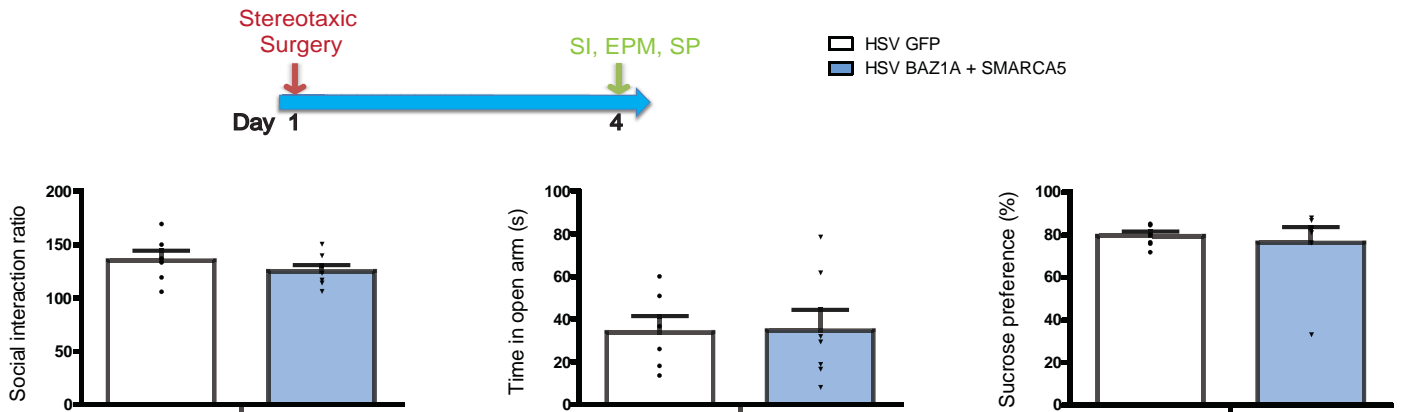**b**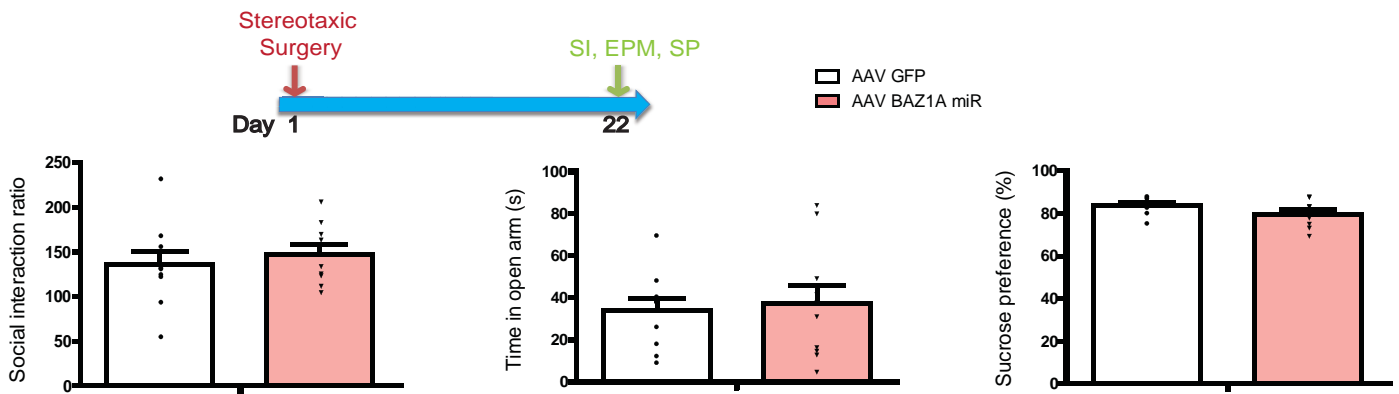**c**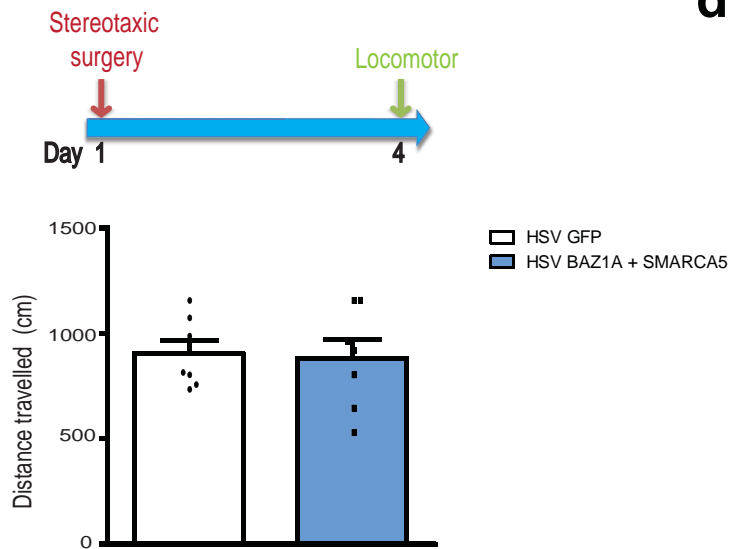**d**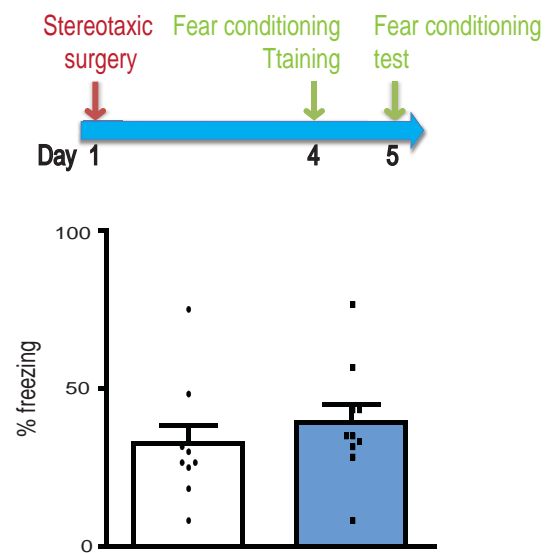

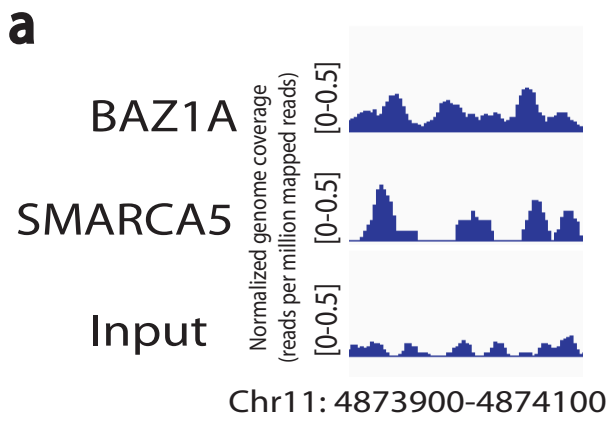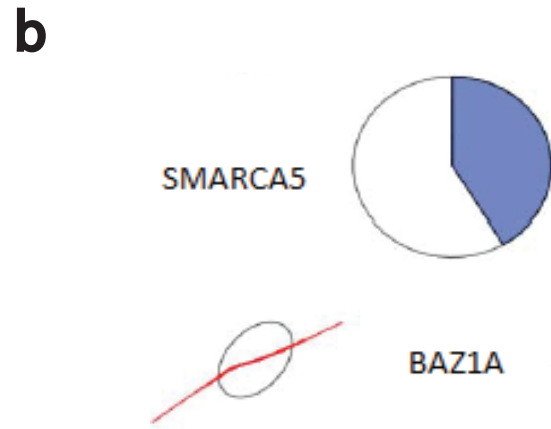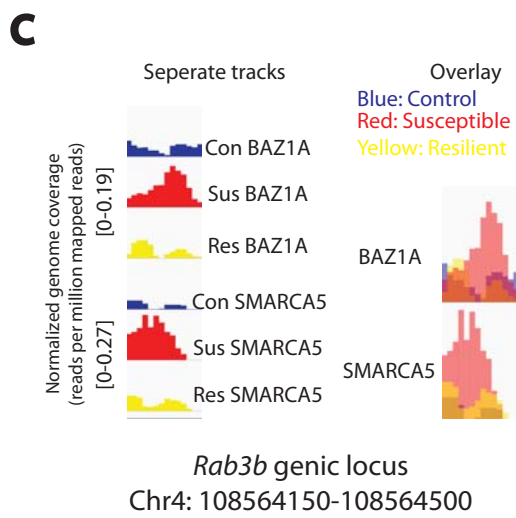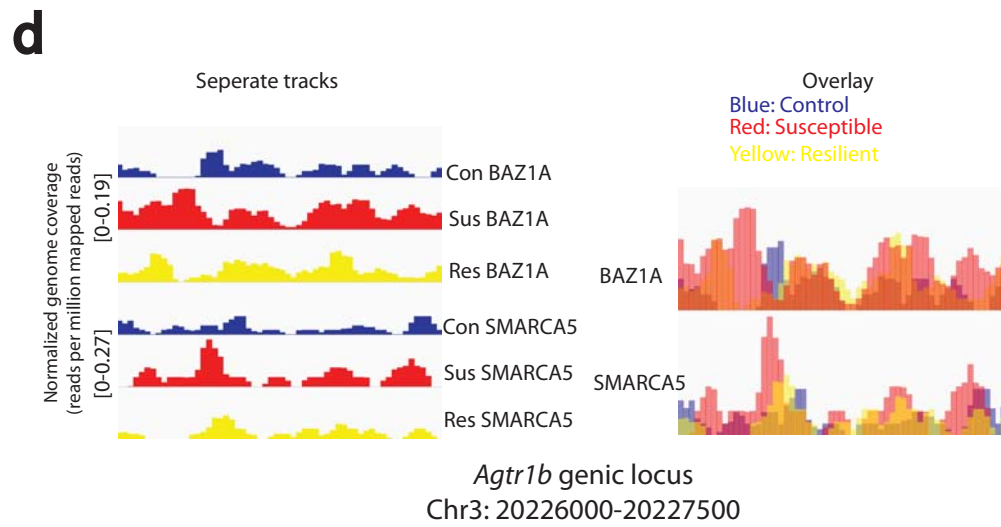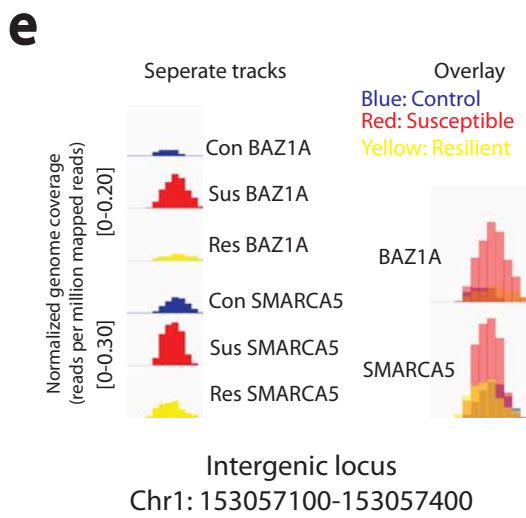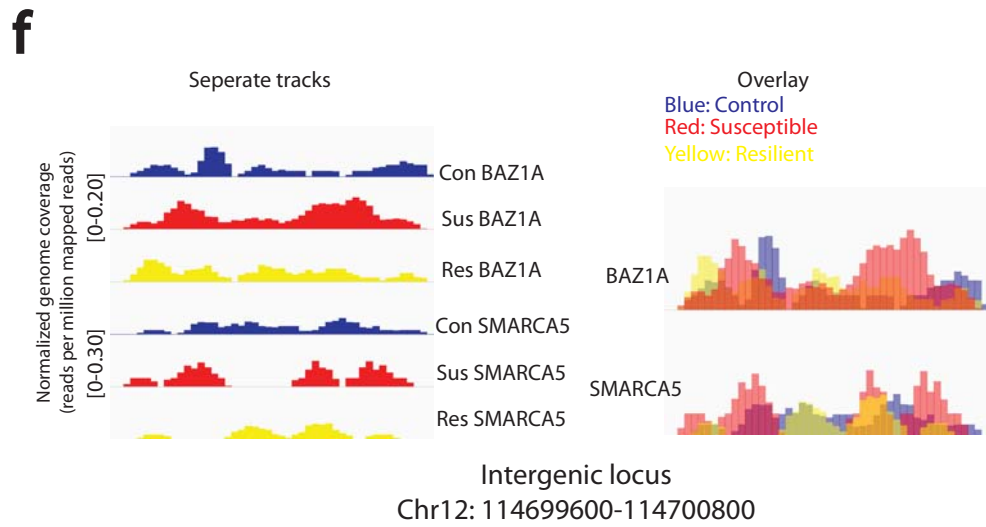

Supplementary Figure 5

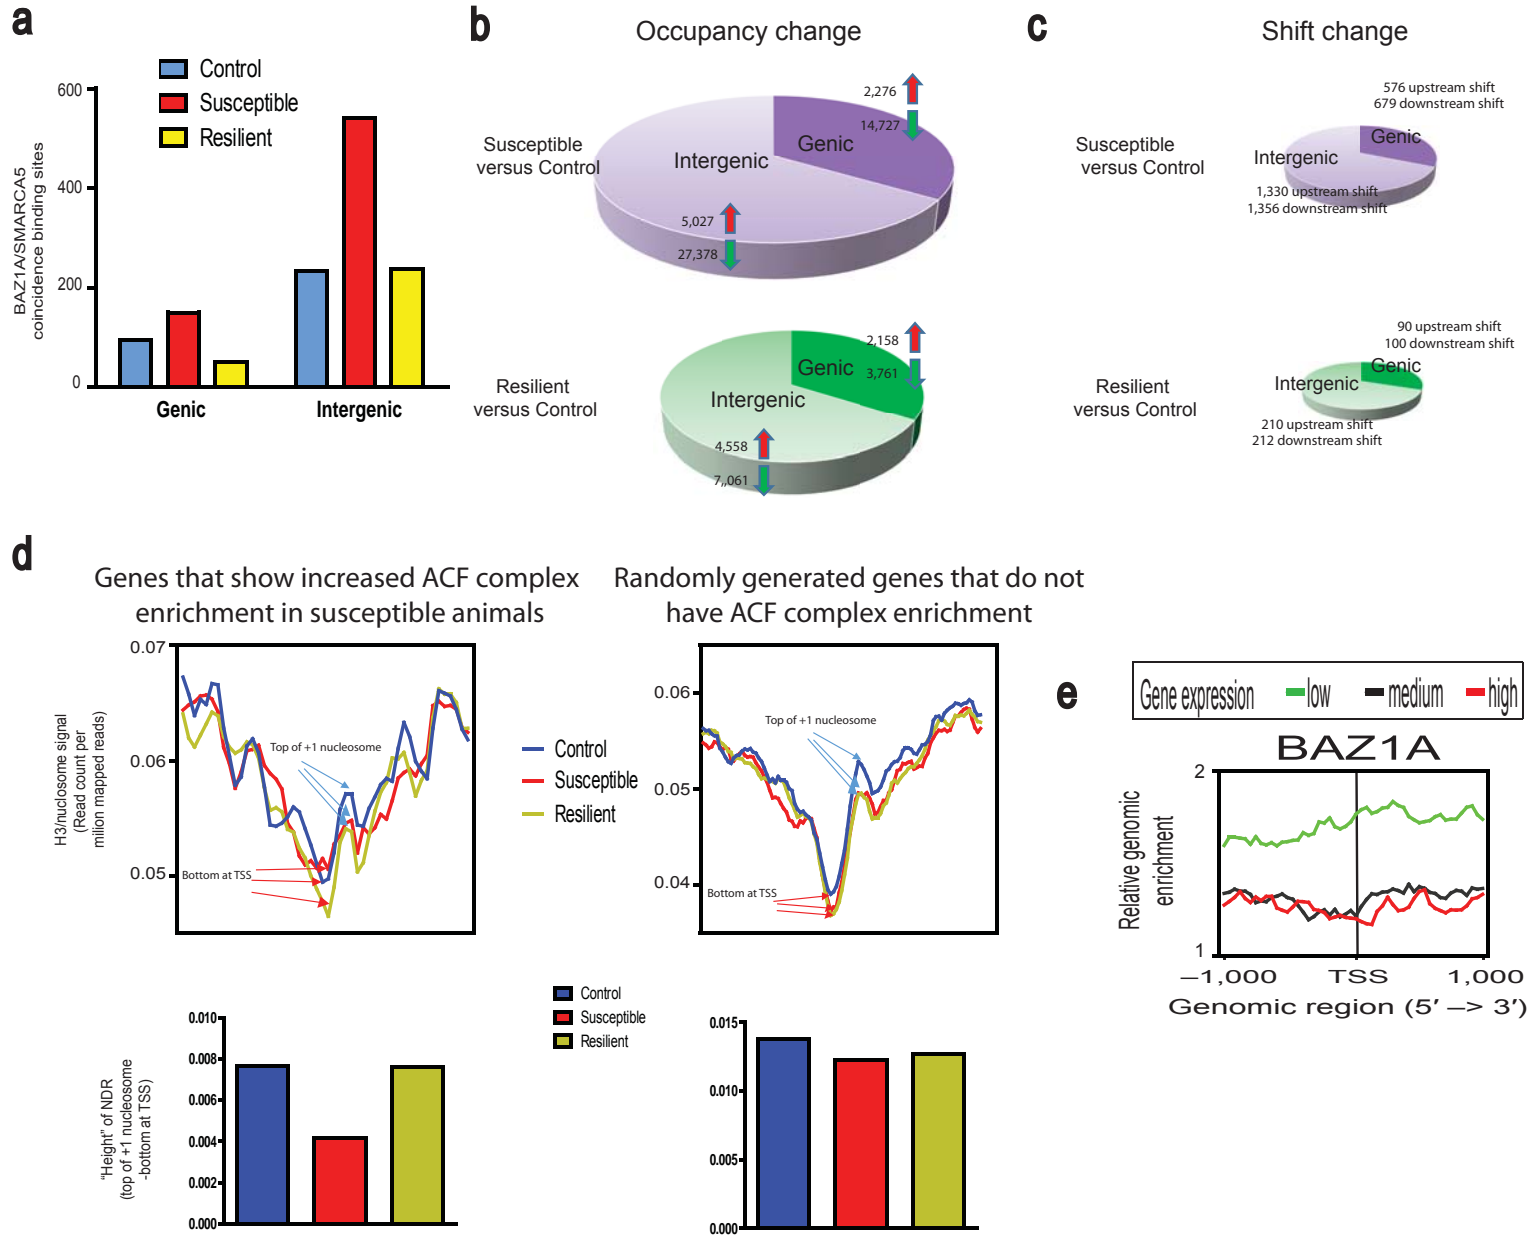

Supplementary Figure 6



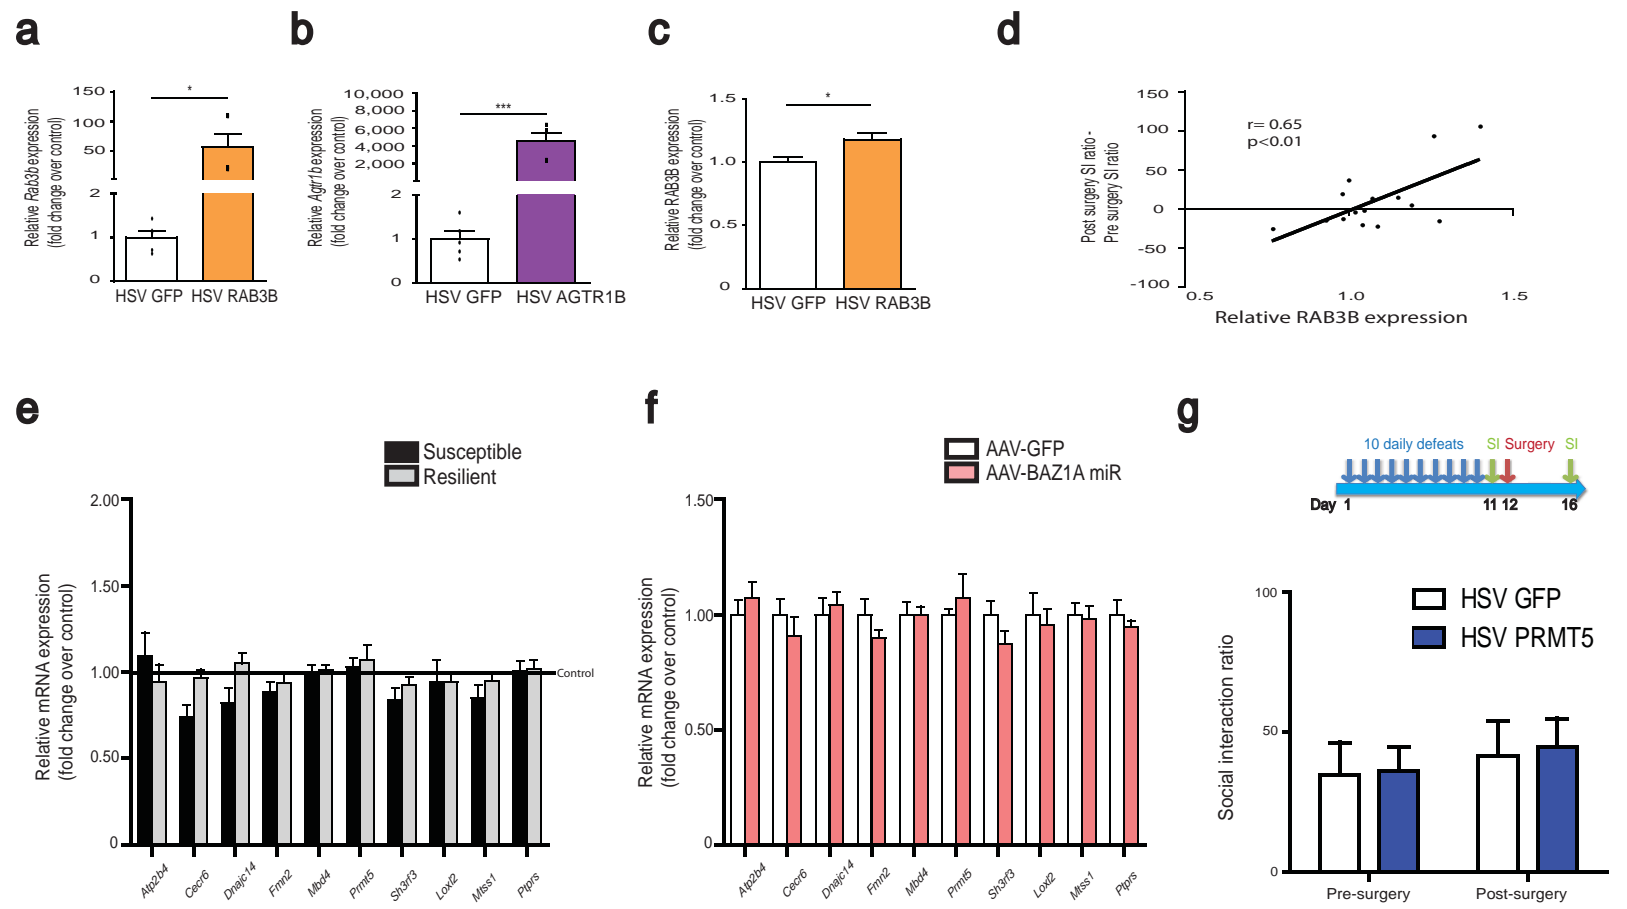

Supplementary Figure 7

**Supplementary Table 1: Demographic information for depression human patients cohort 1 and 2**

| Cohort 1 |     |      |                                                                  |           |     |       |    |     |      |                                                                                                                             |                                                              |                                       |                                       |                                                                                                                                                                                                                           |                                                                                                                                                                                                                                                                                                                                    |
|----------|-----|------|------------------------------------------------------------------|-----------|-----|-------|----|-----|------|-----------------------------------------------------------------------------------------------------------------------------|--------------------------------------------------------------|---------------------------------------|---------------------------------------|---------------------------------------------------------------------------------------------------------------------------------------------------------------------------------------------------------------------------|------------------------------------------------------------------------------------------------------------------------------------------------------------------------------------------------------------------------------------------------------------------------------------------------------------------------------------|
| Sex      | Age | Race | Psychiatric Diagnosis                                            | PMI Hours | RIN | pH    | Ht | Wt  | BMI  | Cause of Death                                                                                                              | Verbal/Emotional Abuse                                       | Physical Abuse                        | Sexual Abuse                          | Prescription and Non Prescription Drugs                                                                                                                                                                                   | Toxicology Results                                                                                                                                                                                                                                                                                                                 |
| F        | 81  | C    | MDD w/ Psychotic features, Alcohol Abuse                         | 7         | 8.9 | 6.076 | 66 | 130 | 21.0 | Natural - COPD & lung cancer                                                                                                | Y                                                            | Y: molested by uncle when growing up. | Y                                     | None Reported                                                                                                                                                                                                             | None                                                                                                                                                                                                                                                                                                                               |
| F        | 83  | C    | Normal Control                                                   | 30        | 8.5 | 6.31  | 59 | 146 | 29.5 | Suicide - sharp force injuries                                                                                              | N                                                            | N                                     | N                                     | Celebrex 200mg; Lipitor 10mg; Lotrel 5/20mg; Atacand 32mg; Remicade infusion; Methotrexate eight tablets; Timolol eye drops; Xalatan eye drops; Pepto-bismol; Calcium; Natural Teas; Tylenol Arthritis                    | All Negative                                                                                                                                                                                                                                                                                                                       |
| F        | 46  | C    | MDD                                                              | 11        | 8.3 | 6.439 | 61 | 198 | 37.4 | Natural - Hypertensive cardiovascular disease with part II obesity contributing                                             | N                                                            | N                                     | N                                     | Chra Cal; Super B Complex; Premarin 1.25 mg; Furosemide 40mg; triheptal 150mg; Klorcon M10; Risperdal 4mg; Nexium 40mg; Toprol XL 50mg; Lexapro 10mg; Wellbutrin SR 150mg; Effexor 75mg; Albuterol Inhaler; Lorazepam 1mg | 0.07 mg/L bupropion; 0.09 mg/L erythrodihydrobupropion; 0.79 mg/L threodihydrobupropion; hydroxybupropion detected; 0.10 mg/L promethazine; 0.09 mg/L citalopram; 8.5 mg/L meprobamate; 6.7 mg/L carisoprodol; 0.077 mg/L hydrocodone; 0.02 mg/L alprazolam; 147 mEq/L Na+; 85 mEq/L K+; 120 mEq/L Cl-; 38 mg/dL Glu; 20 mg/dL VUN |
| M        | 25  | C    | Depression NOS, Opiate Dependence                                | 21        | 8.9 | 6.792 | 68 | 212 | 32.2 | Suicide - Hanging                                                                                                           | Y-picked on at school age 16 for announcing that he was gay. | N                                     | Y-raped at age 14 by another male     | Adderol 20mg; Klonopin 0.5 mg; Lexapro 10mg                                                                                                                                                                               | 1.4 mg/L Diphenhydramine; 0.02 mg/L Citalopram                                                                                                                                                                                                                                                                                     |
| M        | 42  | C    | Depression NOS                                                   | 15        | 9.1 | 6.799 | 68 | 202 | 30.7 | Suicide - Hanging                                                                                                           | U                                                            | U                                     | U                                     |                                                                                                                                                                                                                           | 0.22% Ethanol                                                                                                                                                                                                                                                                                                                      |
| M        | 24  | C    | MDD, severe, recurrent, no psychosis, opiate abuse, alcohol dep. | 23        | 9.1 | 6.446 | 61 | 186 | 35.1 | Suicide - oxycodone overdose (maybe accidental)                                                                             | U                                                            | U                                     | U                                     | Gabapentin 400mg; Sacralfate 1gm; Nexium 40mg; Cymbalta 60mg; Seroquel 100mg; Campral 333mg; Hydroxyzine 50mg; Seroquel 200mg; Desipramine 50mg; Propoxy-N/APAP 100-650; Hydromorphone 4mg; Oxycotin 20mg                 | 0.24 mg/L Desipramine; 0.41 mg/L Oxycodone BLOOD; 3.87 mcg/mL Gabapentin; 120 mg/mL Duloxetine                                                                                                                                                                                                                                     |
| M        | 40  | C    | MDD, Severe, Recurrent w/o psychosis                             | 18.25     | 6.9 | 6.741 | 68 | 168 | 25.5 | Suicide - toxic effects of doxepin and citalopram                                                                           | U                                                            | U                                     | U                                     | Doxepin 100mg; Citalopram 20mg                                                                                                                                                                                            | 1.4 mg/L Doxepin; 0.14 mg/L Demethylodoxepin; 0.47 mg/L Citalopram                                                                                                                                                                                                                                                                 |
| M        | 31  | C    | Normal Control                                                   | 16.16     | 8.1 | 6.823 | 66 | 130 | 21.0 | Natural - Hypertensive cardiovascular disease w/ diabetes mellitus & chronic kidney failure contributing                    | U                                                            | U                                     | U                                     | HTN medicine                                                                                                                                                                                                              | 0.03 mg/L Atropine                                                                                                                                                                                                                                                                                                                 |
| M        | 63  | C    | Normal Control                                                   | 14        | 7.7 | 6.555 | 72 | 180 | 24.4 | Natural - acute MI with prior MIs and hypertension                                                                          | N                                                            | N                                     | Y-raped age 9 by friend of his father | None Reported                                                                                                                                                                                                             | None                                                                                                                                                                                                                                                                                                                               |
| F        | 35  | C    | Opioid dependence, depression NOS                                | 9         | 7.4 | 6.344 | 68 | 134 | 20.4 | Suicide - toxic effects of acetaminophen and hydrocodone                                                                    | N                                                            | N                                     | N                                     | Depot Lapron; Xanax; Prozac; Estrace; Benty; Vicodin (21); Ativan                                                                                                                                                         | 0.02 mg/L Dihydrocodone; 11 mg/L Meprobamate; 1.9 mg/L Carisoprodol; 67 mg/L Acetaminophen; 20 mg/L Hydrocodone.                                                                                                                                                                                                                   |
| M        | 19  | C    | Normal Control                                                   | 20        | 9   | 6.641 | 64 | 125 | 21.5 | Homicide - gunshot                                                                                                          | N                                                            | N                                     | N                                     | None Reported                                                                                                                                                                                                             | None                                                                                                                                                                                                                                                                                                                               |
| M        | 48  | C    | Normal Control                                                   | 14.65     | 10  | 6.822 | 68 | 200 | 30.4 | Natural - mitral valve regurgitation                                                                                        | N                                                            | N                                     | N                                     | Benicar; Lipitor; folic; Tessalon Perles; Concerta; Profen Forte; Soma                                                                                                                                                    | None                                                                                                                                                                                                                                                                                                                               |
| M        | 61  | C    | MDD                                                              | 20        | 8.6 | 6.846 | 68 | 180 | 27.4 | Suicide - suffocation w plastic bag and helium tank                                                                         | N                                                            | N                                     | N                                     | Etidolac 500mgs                                                                                                                                                                                                           | All Negative                                                                                                                                                                                                                                                                                                                       |
| F        | 57  | C    | Depression NOS/Opioid Abuse                                      | 16        | 6.6 | 6.437 | 67 | 185 | 29.0 | Natural - cardio hypertrophy of unknown etiology                                                                            | N                                                            | N                                     | N                                     | Hydrocodone APAPS 500mg; Alprazolam 2mg; Fluoxetine 40mg; Trazodone 50mg; Imetrex; Gen-Sumatriptan 100mg; Unisome; Lexapro 20mg;                                                                                          | 0.13 mg/L Norfluoxetine; 1.4 mg/L Diphenhydramine; 0.35 mg/L Methadone; 0.25 mg/L Citalopram; 103 mg/L Salicylate; 0.06 mg/L Alprazolam; 0.046 mg/L Hydrocodone                                                                                                                                                                    |
| F        | 65  | C    | Normal Control                                                   | 11        | 6.4 | 6.838 | 64 | 140 | 24.0 | Natural - cardiac tamponade due to hemopericardium due to aortic dissection due to arteriosclerotic cardiovascular disease  | N                                                            | N                                     | N                                     | None Reported                                                                                                                                                                                                             | 0.06 mg/L atropine                                                                                                                                                                                                                                                                                                                 |
| M        | 43  | C    | Normal Control                                                   | 15        | 9.5 | 6.886 | 75 | 325 | 40.6 | Natural - Hypertensive cardiovascular disease associated with morbid obesity                                                | N                                                            | N                                     | N                                     | Cardizem, Lipotrol, Lasix                                                                                                                                                                                                 | None                                                                                                                                                                                                                                                                                                                               |
| F        | 59  | C    | Depression NOS                                                   | 10.45     | 9   | 7.033 | 69 | 296 | 43.7 | Natural - hypertensive - atherosclerotic cardiovascular disease w obesity contributing                                      | U                                                            | U                                     | U                                     | Zoloft; Plavix; Cymbalta; Furosemide; Vitorin; Apapro; Metoprolol.                                                                                                                                                        | All Negative                                                                                                                                                                                                                                                                                                                       |
| M        | 61  | C    | Depression NOS                                                   | 19        | 7.5 | 6.01  | 69 | 164 | 24.2 | Suicide - gunshot wound to trunk                                                                                            | N                                                            | N                                     | N                                     | None Reported                                                                                                                                                                                                             | 1.0 mg/L Lidocaine; Etomidate detected                                                                                                                                                                                                                                                                                             |
| M        | 34  | C    | Normal Control                                                   | 23.35     | 9.9 | 6.17  | 70 | 290 | 41.6 | Natural - Hypertensive and atherosclerotic cardiovascular disease w/ contributing factors of uncontrolled diabetes mellitus | N                                                            | N                                     | N                                     | None Reported                                                                                                                                                                                                             | 0.03 mg/L Diphenhydramine; 0.05 mg/L Diliazem; 0.02 mg/L Atropine                                                                                                                                                                                                                                                                  |
| F        | 41  | B    | Depression NOS                                                   | 13        | 2.9 | 5.77  | 63 | 198 | 35.1 | Natural - diabetic ketoacidosis                                                                                             | U                                                            | U                                     | U                                     | Mirtazapine 30mg; Citalopram 40mg; furosemide 40mg;                                                                                                                                                                       | 0.003% Acetone; 0.02 mg/L Mirtazapine; 0.04 mg/L Citalopram                                                                                                                                                                                                                                                                        |
| F        | 50  | C    | Normal Control                                                   | 23.3      | 4.8 | 6.02  | 65 | 130 | 21.6 | Natural - Adrenocortical insufficiency                                                                                      | U                                                            | U                                     | U                                     | Hydrocodone; Dexamethasone; Trametecrine; Demerol, Phenergan                                                                                                                                                              | 0.08 mg/L mepicide; 0.19 mg/L demethylmepicide; 0.09 mg/L Promethazine; 0.03 mg/L Diazepam; 0.09 mg/L Demethyl Diazepam                                                                                                                                                                                                            |
| M        | 60  | C    | Normal Control                                                   | 20        | 8.5 | 6.63  | 69 | 155 | 22.9 | Accident - possible adverse reaction to hyprine during angioplasty surgery                                                  | N                                                            | N                                     | N                                     | Tetracycline 500mg; Alace 5mg; Ecotrin 81mg; Finacea; Protonix; Methocarbamol 750mg; Ecodolac 500mg; Gentak                                                                                                               | None                                                                                                                                                                                                                                                                                                                               |
| M        | 60  | C    | Normal Control                                                   | 30        | 8.7 | 6.7   | 72 | 210 | 28.5 | Natural - Cardiac arrest                                                                                                    | N                                                            | N                                     | N                                     | Benazepril 40mg; Digoxin 0.25mg; Lipitor 10mg; Furosemide 40mg; Micro-K 10mEq; Tekturna 150mg; Flonase; ASA 325mg                                                                                                         | None                                                                                                                                                                                                                                                                                                                               |

## Cohort 2

| Group                   | Cause_Death | Age | Gender | Weight (g) | PH   | Refrig_Delay (hrs) |
|-------------------------|-------------|-----|--------|------------|------|--------------------|
| Control                 | Natural     | 47  | M      | 1412       | 6.49 | 12                 |
| Control                 | Natural     | 41  | M      | 1376       | 6    | 24                 |
| Control                 | Accident    | 32  | M      | 1516       | 6.67 | 29.5               |
| Control                 | Natural     | 46  | M      | 1210       | 6.42 | 19.5               |
| Control                 | Suicide     | 25  | M      | 1600       | 6.73 | 36                 |
| Control                 | Suicide     | 46  | M      | 1600       | 6.83 | 59                 |
| Control                 | Accident    | 42  | M      | 1470       | 6.75 | 63                 |
| Control                 | Suicide     | 41  | F      | 1355.2     | 6.5  | 3.5                |
| Control                 | Accident    | 76  | F      | 1146.9     | -9   | 7                  |
| Depressed + Positive AD | Suicide     | 42  | M      | 1446       | 6.4  | 21                 |
| Depressed + Positive AD | Suicide     | 48  | M      | 1452       | 6.79 | 21.5               |
| Depressed + Positive AD | Suicide     | 22  | M      | 1490       | 6.68 | 24                 |
| Depressed + Positive AD | Suicide     | 53  | M      | 1500       | 6.89 | 41                 |
| Depressed + Positive AD | Suicide     | 39  | M      | 800        | 6.37 | 18.5               |
| Depressed + Positive AD | Suicide     | 35  | M      | 1380       | 6.87 | 31                 |
| Depressed + Positive AD | Suicide     | 40  | F      | 1290       | 6.81 | 49.5               |
| Depressed + Positive AD | Suicide     | 47  | M      | 1690       | 6.79 | 2.5                |
| Depressed + Positive AD | Suicide     | 63  | M      | 1900       | 6.6  | 24                 |
| Depressed + Positive AD | Suicide     | 49  | F      | 1350       | 7.5  | 14.5               |
| Depressed + Positive AD | Suicide     | 64  | M      | 1395.5     | 6.25 | 6.5                |
| Depressed + Negative AD | Suicide     | 52  | M      | 1370.5     | 6.3  | 29                 |
| Depressed + Negative AD | Suicide     | 53  | M      | 1507       | 6.64 | 14                 |
| Depressed + Negative AD | Suicide     | 39  | M      | 1264       | 6.6  | 25.5               |
| Depressed + Negative AD | Suicide     | 49  | M      | 1280       | 6.57 | 32                 |
| Depressed + Negative AD | Suicide     | 53  | M      | no info    | 6.91 | 33.5               |
| Depressed + Negative AD | Suicide     | 68  | M      | 1100       | 6.93 | 32                 |
| Depressed + Negative AD | Suicide     | 63  | M      | 1420       | 6.95 | 50                 |
| Depressed + Negative AD | Suicide     | 55  | F      | 1350       | 6.5  | 2.5                |
| Depressed + Negative AD | Suicide     | 49  | M      | 1432.8     | 6.7  | 2.5                |

**Supplementary Table 2: Quality control for ChIP-seq libraries**

| Sample_id    | Total Raw Reads | Uniquely mapped reads | Reads after deduplication | NSC  | RSC  |
|--------------|-----------------|-----------------------|---------------------------|------|------|
| Input_C      | 55742015        | 40420806              | 30603518                  |      |      |
| Input_R      | 89700862        | 64739824              | 57989097                  |      |      |
| Input_S      | 71408627        | 50925269              | 44841921                  |      |      |
| Con1_BAZ1A   | 57958460        | 41389290              | 11271883                  | 1.23 | 1.35 |
| Con2_BAZ1A   | 36320759        | 25696086              | 22620464                  | 1.09 | 2.36 |
| Con3_BAZ1A   | 73363435        | 53517331              | 32204009                  | 1.07 | 2.17 |
| Res1_BAZ1A   | 89762379        | 60353823              | 46965680                  | 1.06 | 3.3  |
| Res2_BAZ1A   | 32754553        | 23389019              | 19198326                  | 1.11 | 4.15 |
| Res3_BAZ1A   | 58452461        | 41878843              | 21335551                  | 1.16 | 2.5  |
| Sus1_BAZ1A   | 76287210        | 53921446              | 39166385                  | 1.07 | 1.71 |
| Sus2_BAZ1A   | 68188409        | 49048607              | 46829508                  | 1.02 | 2.34 |
| Sus3_BAZ1A   | 92411989        | 66387754              | 49700386                  | 1.06 | 2    |
| Con1_SMARCA5 | 59081146        | 36494423              | 5499690                   | 1.86 | 1.51 |
| Con2_SMARCA5 | 59372588        | 39726198              | 25824438                  | 1.13 | 1.85 |
| Con3_SMARCA5 | 92747357        | 63564841              | 37174774                  | 1.11 | 1.72 |
| Res1_SMARCA5 | 61312955        | 38704149              | 8386450                   | 1.52 | 1.63 |
| Res2_SMARCA5 | 103967904       | 69871399              | 44862383                  | 1.09 | 2.24 |
| Res3_SMARCA5 | 65156934        | 43466346              | 8421768                   | 1.46 | 1.91 |
| Sus1_SMARCA5 | 63906983        | 43373669              | 12990215                  | 1.37 | 2.32 |
| Sus2_SMARCA5 | 101966063       | 64887925              | 12691015                  | 1.39 | 1.56 |
| Sus3_SMARCA5 | 54414110        | 35390937              | 10943603                  | 1.39 | 1.47 |
| Con_input_H3 | 174568278       | 129375594             | 123003711                 |      |      |
| Res_Input_H3 | 170821139       | 123553028             | 114844859                 |      |      |
| Sus_Input_H3 | 158022981       | 118121722             | 105618955                 |      |      |
| Con1_H3      | 165654843       | 112316768             | 107304879                 | 1.02 | 1.57 |
| Con2_H3      | 187081214       | 126971168             | 121307223                 | 1.02 | 1.53 |
| Con3_H3      | 171500107       | 119831682             | 114624211                 | 1.03 | 1.55 |
| Res1_H3      | 146335213       | 102707823             | 98206293                  | 1.03 | 1.48 |
| Res2_H3      | 182238067       | 124566704             | 118018203                 | 1.02 | 1.57 |
| Res3_H3      | 182762004       | 127435339             | 121242713                 | 1.03 | 1.66 |
| Sus1_H3      | 153894689       | 105881281             | 100366004                 | 1.03 | 1.29 |
| Sus2_H3      | 170035193       | 115562497             | 109212915                 | 1.03 | 1.87 |
| Sus3_H3      | 190117087       | 130767930             | 124422474                 | 1.03 | 1.41 |

### Supplementary Table 3: Correlation analysis between individual BAZ1A and SMARCA5 replicates

|              | Con1_SMARCA5 | Con2_SMARCA5 | Con3_SMARCA5 | Res1_SMARCA5 | Res2_SMARCA5 | Res3_SMARCA5 | Sus1_SMARCA5 | Sus2_SMARCA5 | Sus3_SMARCA5 |
|--------------|--------------|--------------|--------------|--------------|--------------|--------------|--------------|--------------|--------------|
| Con1_SMARCA5 | 1.00         | 0.81         | 0.75         | 0.94         | 0.68         | 0.95         | 0.84         | 0.92         | 0.91         |
| Con2_SMARCA5 | 0.81         | 1.00         | 0.93         | 0.89         | 0.88         | 0.88         | 0.90         | 0.93         | 0.91         |
| Con3_SMARCA5 | 0.75         | 0.93         | 1.00         | 0.87         | 0.97         | 0.85         | 0.94         | 0.87         | 0.92         |
| Res1_SMARCA5 | 0.94         | 0.89         | 0.87         | 1.00         | 0.82         | 0.97         | 0.92         | 0.94         | 0.96         |
| Res2_SMARCA5 | 0.68         | 0.88         | 0.97         | 0.82         | 1.00         | 0.80         | 0.93         | 0.79         | 0.88         |
| Res3_SMARCA5 | 0.95         | 0.88         | 0.85         | 0.97         | 0.80         | 1.00         | 0.91         | 0.94         | 0.96         |
| Sus1_SMARCA5 | 0.84         | 0.90         | 0.94         | 0.92         | 0.93         | 0.91         | 1.00         | 0.88         | 0.95         |
| Sus2_SMARCA5 | 0.92         | 0.93         | 0.87         | 0.94         | 0.79         | 0.94         | 0.88         | 1.00         | 0.93         |
| Sus3_SMARCA5 | 0.91         | 0.91         | 0.92         | 0.96         | 0.88         | 0.96         | 0.95         | 0.93         | 1.00         |

|            | Con1_BAZ1A | Con2_BAZ1A | Con3_BAZ1A | Res1_BAZ1A | Res2_BAZ1A | Res3_BAZ1A | Sus1_BAZ1A | Sus2_BAZ1A | Sus3_BAZ1A |
|------------|------------|------------|------------|------------|------------|------------|------------|------------|------------|
| Con1_BAZ1A | 1.00       | 0.75       | 0.74       | 0.72       | 0.76       | 0.77       | 0.73       | 0.72       | 0.73       |
| Con2_BAZ1A | 0.75       | 1.00       | 0.76       | 0.80       | 0.79       | 0.77       | 0.80       | 0.80       | 0.78       |
| Con3_BAZ1A | 0.74       | 0.76       | 1.00       | 0.78       | 0.79       | 0.77       | 0.80       | 0.82       | 0.79       |
| Res1_BAZ1A | 0.72       | 0.80       | 0.78       | 1.00       | 0.79       | 0.76       | 0.83       | 0.83       | 0.80       |
| Res2_BAZ1A | 0.76       | 0.79       | 0.79       | 0.79       | 1.00       | 0.77       | 0.79       | 0.80       | 0.77       |
| Res3_BAZ1A | 0.77       | 0.77       | 0.77       | 0.76       | 0.77       | 1.00       | 0.77       | 0.77       | 0.77       |
| Sus1_BAZ1A | 0.73       | 0.80       | 0.80       | 0.83       | 0.79       | 0.77       | 1.00       | 0.83       | 0.81       |
| Sus2_BAZ1A | 0.72       | 0.80       | 0.82       | 0.83       | 0.80       | 0.77       | 0.83       | 1.00       | 0.82       |
| Sus3_BAZ1A | 0.73       | 0.78       | 0.79       | 0.80       | 0.77       | 0.77       | 0.81       | 0.82       | 1.00       |

## Supplementary Table 7 qPCR Primer List

| Mouse Primer     |                       |
|------------------|-----------------------|
| <i>Baz1a_F</i>   | taggcagagaccatccttgg  |
| <i>Baz1a_R</i>   | gaaagaagggccaaatctcc  |
| <i>Baz1b_F</i>   | agggctgggtccataatagc  |
| <i>Baz1b_R</i>   | gcagctcatccaattccttc  |
| <i>Smarca5_F</i> | aggttgatggacagacacc   |
| <i>Smarca5_R</i> | aaagcgaacactcggacag   |
| <i>Smarca1_F</i> | tcattcagccttcagcacag  |
| <i>Smarca1_R</i> | gcggctctctttcacatag   |
| <i>Smarcd1_F</i> | atgtctgccagttgaatcc   |
| <i>Smarcd1_R</i> | acatgctaactccgggtgac  |
| <i>Smarcd2_F</i> | gaaggcaggaactggaacag  |
| <i>Smarcd2_R</i> | agggtgacaggaaacacacc  |
| <i>Smarcd3_F</i> | ggaaacagatgggtccaag   |
| <i>Smarcd3_R</i> | tgtcgccattgatgtactcc  |
| <i>Smarca2_F</i> | acctgaaccagatgattgc   |
| <i>Smarca2_R</i> | caggtgagcctttccacttc  |
| <i>Smarca4_F</i> | atccgaaaccacaagtaccg  |
| <i>Smarca4_R</i> | ctttctcgccttcactgtc   |
| <i>Actl6b_F</i>  | atgtcaagtccgagccaaac  |
| <i>Actl6b_R</i>  | acgatgccttgctgtaggac  |
| <i>Actl6a_F</i>  | tgtggtgctggagagagatg  |
| <i>Actl6a_R</i>  | atcccagctttcaacctgac  |
| <i>Phf10_F</i>   | gagcgcaggaagaaagaag   |
| <i>Phf10_R</i>   | ggcaagtaccgaagctcatc  |
| <i>Dpf1_F</i>    | ataagaaccggccaggactc  |
| <i>Dpf1_R</i>    | ttggctgtgtttcctctg    |
| <i>Dpf2_F</i>    | ggatggcagcagtttagagg  |
| <i>Dpf2_R</i>    | cgctttggcgtatcttcttc  |
| <i>Smarcc1_F</i> | ttattcccagctacgcatcc  |
| <i>Smarcc1_R</i> | aaggcatgaaccctcatcac  |
| <i>Smarcb1_F</i> | ccaccattgcatacagcatc  |
| <i>Smarcb1_R</i> | tctcggcatcagtcagtgctc |
| <i>Pbrm1_F</i>   | atgacgaagatgggcaagac  |
| <i>Pbrm1_R</i>   | gcactttggaaggcagtttc  |
| <i>Smarcc2_F</i> | tctacctggcgtatcggaac  |
| <i>Smarcc2_R</i> | gtcggctctcagcatctacc  |
| <i>Smarce1_F</i> | aatggttcatcagcggaac   |
| <i>Smarce1_R</i> | ccttctccctctctcttgc   |
| <i>Arid1a_F</i>  | tcggaaacacctcacaacag  |
| <i>Arid1a_R</i>  | aatgcaaatggaaacttgc   |
| <i>Arid1b_F</i>  | agtgcacccgggtctacaag  |
| <i>Arid1b_R</i>  | ctggattctgactggcttcc  |
| <i>Arid2_F</i>   | caagccacttcttctcagc   |

|                 |                        |
|-----------------|------------------------|
| <i>Arid2_R</i>  | gacaggtgatggtgatgacg   |
| <i>Bptf_F</i>   | tctaagcacgcacaaacctg   |
| <i>Bptf_R</i>   | aacatcgtctgcactggttg   |
| <i>Baz2a_F</i>  | gcaagcccagactcaagttc   |
| <i>Baz2a_R</i>  | gccaagacaagaaggcagac   |
| <i>Rsf1_F</i>   | aatcaggcgagttcacaagc   |
| <i>Rsf1_R</i>   | tgccttctctcatcatcc     |
| <i>Rbbp7_F</i>  | gctgcatgagtccttgttg    |
| <i>Rbbp7_R</i>  | agccagttgccagaatgaac   |
| <i>Rbbp4_F</i>  | aaggtggtggatgcaaagac   |
| <i>Rbbp4_R</i>  | ggcttggcttgaagtattg    |
| <i>Chrac1_F</i> | acaatgaggacgatggaagc   |
| <i>Chrac1_R</i> | cagtgggagagaggagatgg   |
| <i>Pole3_F</i>  | gaaaggaaagcgcaagactc   |
| <i>Pole3_R</i>  | tcttcgttctggctcgtcctc  |
| <i>Chd3_F</i>   | aacatctcccaccactcctg   |
| <i>Chd3_R</i>   | ttctagccgttctcccagtg   |
| <i>Chd4_F</i>   | gagacctgccctatgaccag   |
| <i>Chd4_R</i>   | ccagtttccgtagcttcacc   |
| <i>Ino80_F</i>  | tattgatgtctcgccagcag   |
| <i>Ino80_R</i>  | gggaaggaaagtgggaaatc   |
| <i>Gapdh_F</i>  | aggtcgggtgaacggatttg   |
| <i>Gapdh_R</i>  | tgtagaccatgtagttgaggta |
| <i>Agtr1b_F</i> | acattctgggcttcgtgttc   |
| <i>Agtr1b_R</i> | ctacgtccgcaattcacag    |
| <i>Sdk2_F</i>   | acattctgggcttcgtgttc   |
| <i>Sdk2_R</i>   | ctacgtccgcaattcacag    |
| <i>Zbtb7c_F</i> | acattctgggcttcgtgttc   |
| <i>Zbtb7c_R</i> | ctacgtccgcaattcacag    |
| <i>Nit1_F</i>   | acattctgggcttcgtgttc   |
| <i>Nit1_R</i>   | ctacgtccgcaattcacag    |
| <i>Runx1_F</i>  | acattctgggcttcgtgttc   |
| <i>Runx1_R</i>  | ctacgtccgcaattcacag    |
| <i>Rab3b_F</i>  | acattctgggcttcgtgttc   |
| <i>Rab3b_R</i>  | ctacgtccgcaattcacag    |
| <i>Cadps2_F</i> | acattctgggcttcgtgttc   |
| <i>Cadps2_R</i> | ctacgtccgcaattcacag    |
| <i>Grid2_F</i>  | acattctgggcttcgtgttc   |
| <i>Grid2_R</i>  | ctacgtccgcaattcacag    |
| <i>Kcnj6_F</i>  | acattctgggcttcgtgttc   |
| <i>Kcnj6_R</i>  | ctacgtccgcaattcacag    |
| <i>Prdm16_F</i> | acattctgggcttcgtgttc   |
| <i>Prdm16_R</i> | ctacgtccgcaattcacag    |
| <i>Tusc3_F</i>  | ctacgtccgcaattcacag    |
| <i>Tusc3_R</i>  | ctacgtccgcaattcacag    |
| <i>Dmrt1_F</i>  | accagtggcagatgaagacc   |
| <i>Dmrt1_R</i>  | acacactggccttggcttct   |

|                  |                       |
|------------------|-----------------------|
| <i>Irx6_F</i>    | gcgctcaagaaggagaac    |
| <i>Irx6_R</i>    | ggcttccaggctactcagc   |
| <i>Plcz_F</i>    | ttggagacttctgcttctg   |
| <i>Plcz_R</i>    | cctccttgatccgtgatagg  |
| <i>Espnl_F</i>   | aatggacacatggagtgtg   |
| <i>Espnl_R</i>   | cagtggaggagggtggaaatg |
| <i>Myo1g_F</i>   | tcaagtccacctgtgtgctc  |
| <i>Myo1g_R</i>   | agtccttgacgctcttggtc  |
| <i>Pth2r_F</i>   | ttccagggttctctgctg    |
| <i>Pth2r_R</i>   | gtgggttgccagagatgag   |
| <i>Agbl4_F</i>   | atccttcaacagggatgctg  |
| <i>Agbl4_R</i>   | aaatgttcttgccacgttcc  |
| <i>Dffb_F</i>    | gagtacctgagctcttgg    |
| <i>Dffb_R</i>    | ggagtgcttgaaagacagc   |
| <i>Mad1l1_F</i>  | tcgtggtgagctacagcag   |
| <i>Mad1l1_R</i>  | tgccatctctctcttggctc  |
| <i>Dcc_F</i>     | tcaagcacggaatgtgaaag  |
| <i>Dcc_R</i>     | aatgggtggttcgttgagag  |
| <i>Fsip1_F</i>   | gatgcacagactcgacaagc  |
| <i>Fsip1_R</i>   | gtgtttccaactcctcgtc   |
| <i>Meox_F</i>    | atcttcaacgagcagcatcc  |
| <i>Meox_R</i>    | gatcgtccaagtaccatgc   |
| <i>Spef2_F</i>   | tgcacgattggaagaactg   |
| <i>Spef2_R</i>   | attgttgagggtggtgaac   |
| <i>Zfp438_F</i>  | caaacctagcctgtggaagc  |
| <i>Zfp438_R</i>  | tgcttctgcatacttgctg   |
| <i>Mtss1l_F</i>  | acatcaccagccagaaatcc  |
| <i>Mtss1l_R</i>  | acagtgcctccaccagtagg  |
| <i>Dnajc14_F</i> | ctgttctctggctgggttc   |
| <i>Dnajc14_R</i> | tcgggtcacttctcttcag   |
| <i>Fmn2_F</i>    | gacctgactgcctgagacc   |
| <i>Fmn2_R</i>    | tcgcactcctcatctgtgtc  |
| <i>Sh3rf3_F</i>  | ctggagggtggaagtctgagc |
| <i>Sh3rf3_R</i>  | ctgttgggatggtggtatcc  |
| <i>Mbd4_F</i>    | acgtgtcggagcttctcaag  |
| <i>Mbd4_R</i>    | tgattctccaaagccagtc   |
| <i>Atp2b4_F</i>  | tccgaaatgagaagggtgag  |
| <i>Atp2b4_R</i>  | atagcaaaccgacatctgc   |
| <i>Prmt5_F</i>   | ctgagtgtctggatggagca  |
| <i>Prmt5_R</i>   | gcatctcaaactgtgcctca  |
| <i>Ptprs_F</i>   | gagacggcctacgagttacg  |
| <i>Ptprs_R</i>   | agggtgagcccattgtactg  |
| <i>Loxl2_F</i>   | ggaagctgcgttactggaag  |
| <i>Loxl2_R</i>   | agggttgctctggctttag   |
| <i>Cecr6_F</i>   | ggtcgtgagctaccaacagc  |
| <i>Cecr6_R</i>   | cagaggaggagcaccatag   |



| <b>Human primer</b> |                      |
|---------------------|----------------------|
| <i>SMARCA5_F</i>    | gagcaacagcagcaacaag  |
| <i>SMARCA5_R</i>    | gcagcaggtgaatgaaatg  |
| <i>BAZ1B_F</i>      | aaatgcaccttgggtcgtag |
| <i>BAZ1B_R</i>      | ggatttcttgagggttcc   |
| <i>BAZ1A_F</i>      | gagcttcgttgagcaatcc  |
| <i>BAZ1A_R</i>      | gaactcctgcttgctgtc   |
| <i>RAB3B_F</i>      | tcaatgctgtccaagactgg |
| <i>RAB3B_R</i>      | tgtccagcgaatcagacatc |
| <i>AGTR1_F</i>      | cttgccactatgggtgtc   |
| <i>AGTR1_R</i>      | gatgatgcagtgacttgg   |
